# 1 Rats optimally accumulate and discount evidence in a dy- 2 namic environment

3

4 Alex T Piet<sup>1</sup>, Ahmed El Hady<sup>1,3,\*</sup>, Carlos D Brody<sup>1,2,3,\*</sup>

5 1. Princeton Neuroscience Institute, Princeton University, Princeton, United States.

6 2. Department of Molecular Biology, Princeton University, Princeton, United States.

7 3. Howard Hughes Medical Institute, Princeton University, Princeton, United States.

8 \*correspondence should be addressed to Ahmed El Hady (ahady@princeton.edu) or Carlos D Brody

9 (brody@princeton.edu)

10

## 11 **Abstract**

12 How choices are made within noisy environments is a central question in the neuroscience of decision  
13 making. Previous work has characterized temporal accumulation of evidence for decision-making in  
14 static environments. However, real-world decision-making involves environments with statistics that  
15 change over time. This requires discounting old evidence that may no longer inform the current state  
16 of the world. Here we designed a rat behavioral task with a dynamic environment, to probe whether  
17 rodents can optimally discount evidence by adapting the timescale over which they accumulate it. Ex-  
18 tending existing results about optimal inference in a dynamic environment, we show that the optimal  
19 timescale for evidence discounting depends on both the stimulus statistics and noise in sensory pro-  
20 cessing. We found that when both of these components were taken into account, rats accumulated  
21 and temporally discounted evidence almost optimally. Furthermore, we found that by changing the  
22 dynamics of the environment, experimenters could control the rats' accumulation timescale, switching  
23 them from accumulating over short timescales to accumulating over long timescales and back. The  
24 theoretical framework also makes quantitative predictions regarding the timing of changes of mind in  
25 the dynamic environment. This study establishes a quantitative behavioral framework to control and  
26 investigate neural mechanisms underlying the adaptive nature of evidence accumulation timescales and  
27 changes of mind.

## 28 Introduction

29 Decision making refers to the cognitive and neural mechanisms underlying processes that generate  
30 choices. In our daily life, the processes of decision making are ubiquitous. Decision making has been a  
31 major focus in the neuroscience community because it bridges sensory, motor, and executive functions.  
32 A well characterized decision making paradigm is that of “evidence accumulation” or “evidence integra-  
33 tion” referring to the process by which the subject gradually processes evidence for or against different  
34 choices until making a well defined choice. Evidence accumulation is thought to underlie many different  
35 types of decisions from perceptual decisions (Gold and Shadlen, 2007; Carandini and Churchland, 2013;  
36 Hanks and Summerfield, 2017), to social decisions (Krajbich et al., 2015), and to value based decisions  
37 (Basten et al., 2010).

38 Most behavioral studies to date have focused on evidence accumulation in stationary environments.  
39 In the case of stationary environments, the normative behavioral strategy used is perfect integration  
40 (Bogacz et al., 2006), which refers to equal weighting of all incoming evidence across time. However,  
41 real world environments are complex and change over time. In this case, a strategy based on per-  
42 fect integration will be suboptimal due to the changing statistics of the environment. Crucially, in  
43 a dynamic environment older observations may no longer reflect the current state of the world, and  
44 an observer needs to modify their inference processes to discount older evidence. Previous studies  
45 have demonstrated that humans can modify the timescales of evidence integration, adopting “leaky”  
46 integration when beneficial (Ossmy et al., 2013; Glaze et al., 2015). This observation opens many  
47 questions related to why and how subjects might alter their integration timescales. To answer “why”  
48 or normative questions, one would ideally like to develop a model that can be directly compared to the  
49 standard evidence accumulation models used in the decision making literature. Two recent studies have  
50 developed this connection to drift-diffusion models, and examined evidence accumulation in dynamic  
51 environments either in humans (Glaze et al., 2015; Gold and Stocker, 2017) or in ideal observer models  
52 (Veliz-Cuba et al., 2016). Animal models of behavior facilitate investigation of “how” or mechanistic  
53 questions, by allowing measurement and perturbation of neural circuits. Here, we demonstrate that rats  
54 are capable of adopting the optimal integration timescale predicted by the recently developed modeling  
55 framework (Veliz-Cuba et al., 2016), and we furthermore show that they can dynamically modulate  
56 their integration timescale according to changing environmental statistics.

57 In the present study, we extend a previously published pulse-based accumulation of evidence task  
58 the “Poisson clicks task” (Brunton et al., 2013; Erlich et al., 2015; Hanks et al., 2015) to a dynamic  
59 environment. We refer to our task as the “Dynamic clicks task”. We extend results from the literature  
60 (Veliz-Cuba et al., 2016) to develop the optimal inference process for our task. The ideal observer

61 is closely related to the “drift-diffusion model” used widely in the decision making literature (Bogacz  
62 et al., 2006; Ratcliff and McKoon, 2008). The primary difference is that, in addition to integrating  
63 sensory evidence, the ideal observer discounts accumulated evidence at a rate proportional to the  
64 volatility of the environment, and the reliability of each evidence pulse. The reliability of each pulse  
65 is determined by the stimulus statistics (e.g., the pulse rates), as well as noise in the subject’s sensory  
66 transduction process. While the exact origin of sensory noise is unclear, quantitative modeling can  
67 separate sensory noise from other types of noise (Brunton et al., 2013). Here, we use sensory noise to  
68 refer to noise that scales with the amount of evidence. The role of sensory noise in decision making  
69 processes is a relatively unexplored area. Studies in the literature are beginning to document under  
70 what circumstances subjects modify their behavior based on noise in the sensory evidence (Gureckis  
71 and Love, 2009; Zylberberg et al., 2016).

72 Using high-throughput behavioral training, we trained rats to perform this task. With a combina-  
73 tion of quantitative methods, we find that rats’ adaptation to the dynamic environment is such that  
74 they adopt the optimal timescale for evidence accumulation. Our findings establish rats as an adequate  
75 animal model for evidence accumulation in a dynamic environment. Training rodents on state of the art  
76 cognitive tasks opens up the opportunity to understand the neuronal mechanisms underlying complex  
77 behavior. Rodents can be trained in a high throughput manner, are amenable to genetic manipulation,  
78 are accessible to electrophysiological and optogenetic manipulations, and a large number of experimen-  
79 tal subjects can be used. Finally, the dynamic clicks task opens up the opportunity to study the neural  
80 underpinnings of evidence integration in a dynamic environment as this task gives the experimentalist  
81 a unique quantitative handle over the integration timescale of the animals.

82

## 83 **Results**

### 84 **A dynamic decision making task**

85 We developed a decision making task that requires accumulating noisy evidence in order to infer a state  
86 that is hidden, and dynamic. Rats were trained to infer, at any moment during the course of a trial,  
87 which of two states the environment was in at that moment. These could be either a state in which  
88 randomly-timed auditory clicks were played from a left-speaker at a high rate and right speaker clicks  
89 were played at a low rate, or its inverse (low rate on the left, high rate on the right). In more detail,  
90 in each trial of our task, we first illuminate a center light inside an automated operant chamber, to  
91 indicate that the rat may start the trial by nose-poking into the center port. Once the rat enters the  
92 center port, auditory clicks play from speakers positioned on the left and right sides of the rat. The  
93 auditory clicks are generated from independent Poisson processes. Importantly, the left and right side

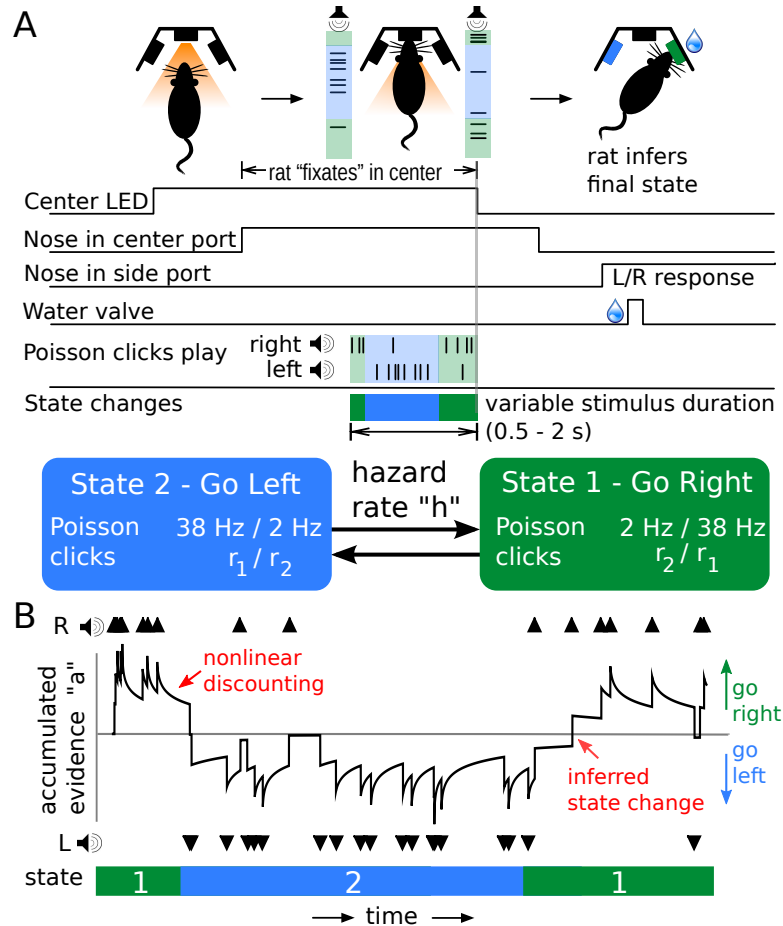

**Figure 1: Dynamic Clicks Task structure and example trial.** (A) Schematic of task events and timing. A center light illuminates indicating the rat may initiate a trial by poking its nose into a center port. Auditory clicks are generated from state-dependent Poisson processes (the two states are schematized by light green and light blue backgrounds) and played concurrently from left and right speakers. The hidden state toggles between two states according to a telegraph process with hazard rate  $h$ . When the auditory clicks end, and the center light turns off, the rats must infer which of the two states the trial ended in and report their decision by poking into one of two reward ports. Trials have random durations so the rat must be prepared to answer at all time points. (B) An example trial illustrates features of the task. The hidden state transitions randomly, and the auditory clicks are generated accordingly. The optimal inference process (black line; see text for its derivation) accumulates clicks, and discounts accumulated evidence proportionally to the volatility of the environment and click statistics. For the optimal process, a choice is generated at the end of the trial according to whether the optimal inference variable is above or below 0.

94 Poisson rate parameters are dependent on a hidden state that changes dynamically during the course  
95 of each trial. This is in sharp contrast to previous studies where the Poisson click rates are constant  
96 for the duration of each trial (Brunton et al., 2013; Erlich et al., 2015; Hanks et al., 2015). Within  
97 each trial, the dynamic environment is in one of two hidden states  $S^1$ , and  $S^2$ , each of which has an  
98 associated left and right click generation rate ( $S^1$ : rates  $r_L^1$  and  $r_R^1$ , respectively;  $S^2$ : rates  $r_L^2$  and  $r_R^2$ ).  
99 In this study  $S^1$  and  $S^2$  were symmetric ( $r_R^1 = r_L^2 = \text{high rate } r_1$  and  $r_R^2 = r_L^1 = \text{low rate } r_2$ ). Each  
100 trial starts with equal probability in one of the two states, and switches stochastically between them at  
101 a fixed “hazard rate”  $h$ . On each time step, the switch probability is given by  $h\Delta t$ , (with  $\Delta t$  kept small  
102 enough that  $h\Delta t \ll 1$ ). At the end of the stimulus period, the auditory clicks end, and the center  
103 light turns off, indicating the rat must make a left or right choice by entering one of the side reward  
104 ports. The rat is rewarded with a water drop for correctly inferring the hidden state at the end of the  
105 stimulus period (if  $S^1$ , go right; if  $S^2$ , go left). The stimulus period duration is variable on each trial  
106 (0.5 – 2 seconds), so the rat must be prepared to infer the current hidden state at all times. Figure  
107 1 shows a schematic of task events, as well as an example trial. Rats trained every day, performing  
108 150-1000 self-paced trials per day.

109

## 110 **Optimal inference in a dynamic environment**

111 Here we derive the optimal procedure for inferring the hidden state. Optimality, in this setting, refers  
112 to reward maximizing. Given that each trial’s duration is imposed by the experimenter and thus fixed  
113 to the rat, maximizing reward is equivalent to maximizing accuracy (Bogacz et al., 2006). We build on  
114 results from Veliz-Cuba et al. 2016, but a basic outline is repeated here for continuity. Mathematical  
115 details can be found in the supplementary materials.

116 Before diving into the derivation, it is worth building some intuition. Because the hidden state is  
117 dynamic, auditory clicks heard at the start of the trial are unlikely to be informative of the current  
118 state. However, because state transitions are hidden, an observer doesn’t know how far back in time  
119 observations are still informative of the current state. Our derivation derives the optimal weighting of  
120 older evidence. We first consider observations in discrete timesteps of short duration  $\Delta t$ . Within each  
121 timestep, a momentary evidence sample  $\epsilon$  is generated. This sample is either a click on the left, a click  
122 on the right, no clicks, or a click on both sides (we will consider  $\Delta t$  small enough that  $r_1\Delta t \ll 1$  and  
123  $r_2\Delta t \ll 1$  so that multiple clicks are not generated within one timestep).

124 Following Veliz-Cuba et al. 2016, the probability of being in State 1 at time  $t$ , given all observed  
125 samples up to time  $t$ :

$$P(S^1|\epsilon_{1..t}) \propto P(\epsilon_t|S^1) \left( (1 - h\Delta t) P(S^1|\epsilon_{1..t-1}) + h\Delta t P(S^2|\epsilon_{1..t-1}) \right). \quad (1)$$

126 We can interpret this equation as the probability of being in State 1 given all observed evidence up  
 127 to time  $t$  ( $P(S^1|\epsilon_{1..t})$ ) is proportional to the probability of observing the evidence sample at time  $t$   
 128 given State 1 ( $P(\epsilon_t|S^1)$ ) times the independent probability that we were in State 1 given evidence from  
 129 timesteps  $1 \dots t-1$  ( $P(S^1|\epsilon_{1..t-1})$ ). This second term is decomposed into two terms which depend on  
 130 the probability of remaining in the same state from the last time step ( $(1-h\Delta t)P(S^1|\epsilon_{1..t-1})$ ) and  
 131 the probability of changing states after the last time step ( $h\Delta tP(S^2|\epsilon_{1..t-1})$ ).

132 Combining the probability of each state into a ratio, we can write the posterior probability ratio  
 133 ( $R_t$ ) of the current state given all previous evidence samples  $\epsilon_{1..t}$ :

$$R_t = \frac{P(S^1|\epsilon_{1..t})}{P(S^2|\epsilon_{1..t})} = \frac{P(\epsilon_t|S^1)}{P(\epsilon_t|S^2)} \left( \frac{(1-h\Delta t)R_{t-1} + h\Delta t}{(h\Delta t)R_{t-1} + 1 - h\Delta t} \right). \quad (2)$$

134 Observe that in a static environment ( $h=0$ ), the term on the far right simplifies to  $R_{t-1}$  and (2) becomes  
 135 the statistical test known as the Sequential Probability Ratio Test (SPRT) (Wald, 1945; Barnard, 1946;  
 136 Bogacz et al., 2006). A recent study demonstrated that monkeys could accurately perform a literal  
 137 instantiation of the SPRT (Kira et al., 2015). When  $h \neq 0$ , the more complicated expression reflects the  
 138 fact that previous evidence samples might no longer be informative of the current state, in a manner  
 139 proportional to the environmental volatility  $h$ .

140 In order to compare (2) to standard decision making models like the drift-diffusion model (DDM)  
 141 we will transform the expression into a differential equation. We can accomplish this by taking the  
 142 logarithm of (2), then substituting  $\hat{a} = \log(R)$ , and finally taking the limit of  $\Delta t$  goes to 0 (See  
 143 Veliz-Cuba et al. 2016 and supplementary materials for details):

$$d\hat{a} = \log\left(\frac{P(\epsilon_t|S^1)}{P(\epsilon_t|S^2)}\right) - 2h \sinh(\hat{a}) dt. \quad (3)$$

144 This differential equation describes the evolution of the log-probability ratio of being in each of the  
 145 two hidden states ( $\hat{a} = \log\left(\frac{P(S^1|\epsilon_{1..t})}{P(S^2|\epsilon_{1..t})}\right)$ ):  $\hat{a} > 0$  indicates more evidence for  $S^1$ , while  $\hat{a} < 0$  indicates  
 146 more evidence for  $S^2$ . Momentary evidence samples  $\epsilon_t$  are incorporated into the log-probability ratio  
 147 through the evidence term ( $\log\left(\frac{P(\epsilon_t|S^1)}{P(\epsilon_t|S^2)}\right)$ ). The previously accumulated evidence is forgotten by a  
 148 nonlinear discounting term ( $-2h \sinh(\hat{a})$ ) (See Fig 2C). The evidence discounting reduces the effect of  
 149 older evidence, weighting recent evidence more. This discounting reflects the fact that older evidence  
 150 may no longer be informative of the current state of the environment. In a static environment ( $h=0$ ),  
 151 the discounting term is eliminated, and the ideal observer perfectly integrates the momentary evidence  
 152 samples. In analysis of the static decision making models, the evidence term is commonly approximated  
 153 by its expectation (drift) and variance (diffusion), transforming (3) into the Drift-Diffusion Model

154 (DDM) for decision making (Bogacz et al., 2006).

155 From this point on our derivation departs from existing results in the literature. In order to develop a  
 156 deeper understanding of the optimal inference on our task, we will evaluate the evidence term. Because  
 157 of the discrete nature of the Poisson evidence, this term can be precisely evaluated for each evidence  
 158 sample in a way that is not possible in other decision making tasks. In a small sample window of  
 159 duration  $\Delta t$ , the probability of a Poisson event is  $r\Delta t$ , where  $r$  is the parameter of the Poisson process  
 160 (provided  $r\Delta t \ll 1$ ). In our task a momentary sample  $\epsilon_t$  is the result of two independent Poisson  
 161 processes and can take on four possible values: a click on both sides, a click on the right, a click on the  
 162 left, or no clicks. Evaluating the evidence term for these four conditions:

A click on both sides

$$\log \frac{P(\epsilon_t|S^1)}{P(\epsilon_t|S^2)} = \log \frac{P(\text{click-R}|S^1) P(\text{click-L}|S^1)}{P(\text{click-R}|S^2) P(\text{click-L}|S^2)} = \log \frac{(r_1\Delta t)(r_2\Delta t)}{(r_2\Delta t)(r_1\Delta t)} = 0. \quad (4)$$

No clicks

$$\log \frac{P(\epsilon_t|S^1)}{P(\epsilon_t|S^2)} = \log \frac{P(\text{no-click-R}|S^1) P(\text{no-click-L}|S^1)}{P(\text{no-click-R}|S^2) P(\text{no-click-L}|S^2)} = \log \frac{(1-r_1\Delta t)(1-r_2\Delta t)}{(1-r_2\Delta t)(1-r_1\Delta t)} = 0. \quad (5)$$

A click on the right

$$\log \frac{P(\epsilon_t|S^1)}{P(\epsilon_t|S^2)} = \log \frac{P(\text{click-R}|S^1) P(\text{no-click-L}|S^1)}{P(\text{click-R}|S^2) P(\text{no-click-L}|S^2)} = \log \frac{(r_1\Delta t)(1-r_2\Delta t)}{(r_2\Delta t)(1-r_1\Delta t)} \equiv +\kappa(r_1, r_2). \quad (6)$$

A click on the left

$$\log \frac{P(\epsilon_t|S^1)}{P(\epsilon_t|S^2)} = \log \frac{P(\text{no-click-R}|S^1) P(\text{click-L}|S^1)}{P(\text{no-click-R}|S^2) P(\text{click-L}|S^2)} = \log \frac{(1-r_1\Delta t)(r_2\Delta t)}{(1-r_2\Delta t)(r_1\Delta t)} \equiv -\kappa(r_1, r_2). \quad (7)$$

163 We define the function  $\kappa(r_1, r_2)$  to be the increase in the log-probability ratio from the arrival of a  
 164 single click on the right, given click rates  $r_1, r_2$ . The function  $\kappa$  tells us how reliably each click indicates  
 165 the hidden state. This is easily seen when letting  $\Delta t \rightarrow 0$ , so  $\kappa \rightarrow \log \frac{r_1}{r_2}$ . If the click rates  $r_1$  and  $r_2$   
 166 are very similar (so  $\kappa$  is small) then we expect many distractor clicks (clicks from the smaller click rate  
 167 that do not indicate the correct state), so an individual click tells us little about the underlying state.  
 168 On the other hand, if the click rates are very different (so  $\kappa$  is large) then we expect very few distractor  
 169 clicks, so an individual click very reliably informs the current state. In the limit of one of the click rates  
 170 going to zero:  $\kappa \rightarrow \infty$ , and a single click tells us the current state with absolute certainty. In our task,  
 171 the two click rates  $r_1$  and  $r_2$  always sum to 40 hz. Figure 2A shows  $\kappa$  as a function of the click rates.

172 Re-writing the log-evidence term in (3) in terms of  $\kappa$  and using  $\delta_{L/R,t}$  to represent the left/right  
173 click times, we can summarize across all four conditions:

$$d\hat{a} = \kappa(r_1, r_2)(\delta_{R,t} - \delta_{L,t}) - 2h \sinh(\hat{a})dt. \quad (8)$$

174 We can then rescale equation (8) by  $\kappa$ , let  $a = \frac{\log(R)}{\kappa}$ , to put our evidence accumulation equation in  
175 units of clicks:

$$da = \delta_{R,t} - \delta_{L,t} - \frac{2h}{\kappa} \sinh(\kappa a)dt. \quad (9)$$

176 Here  $\delta_{L/R,t}$  are trains of delta functions at the times of the left and right clicks. Equation (9) has  
177 a simple interpretation, sensory clicks are integrated ( $\delta_{R,t} - \delta_{L,t}$ ), while accumulated evidence is dis-  
178 counted ( $-\frac{2h}{\kappa} \sinh(\kappa a)$ ) proportionally to the volatility of the environment ( $h$ ), and the reliability of  
179 each click ( $\kappa$ ). This interpretation also allows for a simple assay of behavior: do rats adopt the optimal  
180 discounting timescale? We will present two quantitative methods for measuring the rats discounting  
181 timescales. However, before examining rat behavior, we need to examine the impact of sensory noise  
182 on optimal behavior.

183

#### 184 **Sensory noise decreases click reliability**

185 The function  $\kappa(r_1, r_2)$  tells us how reliably each click indicates the underlying state as a function of  
186 the click generation rates  $r_1$  and  $r_2$ . The computation above of  $\kappa$  assumes that each click is detected  
187 and correctly localized as either a left or right click with perfect accuracy. Previous studies using  
188 pulse-based evidence demonstrate that rats have significant sensory noise (Brunton et al., 2013; Scott  
189 et al., 2015). The term sensory noise in the context of these studies refers to sources of errors that scale  
190 with the number of pulses of evidence. Sensory noise was measured by fitting parametric models that  
191 included a parameter for how much uncertainty in the accumulation variable was increased due to each  
192 pulse of evidence. The exact biological origin of this noise remains unclear. It could arise from sensory  
193 processing errors, or from disruption of coding in the putative integration circuit at the moment of  
194 pulse arrival. Regardless of its origins, sensory noise is a significant component of rodent behavior.

195 We will now show that sensory noise decreases how reliably each click indicates the underlying state.  
196 While sensory noise can be modeled in many ways, primarily the mislocalization of clicks changes the  
197 click reliability. We analyze the cases of Gaussian noise on the click amplitudes and missing clicks,  
198 and provide a general argument for mislocalization in the supplementary materials. Mislocalization  
199 refers to how often clicks are incorrectly localized to the other speaker (hearing a click from the left and



## Theory Summary

|                   |                                                                                                                        |
|-------------------|------------------------------------------------------------------------------------------------------------------------|
| Click Reliability | $\kappa = \log\left(\frac{r_1(1-n)+r_2n}{r_2(1-n)+r_1n}\right)$                                                        |
| Optimal Inference | $da = \delta_{R,t} - \delta_{L,t} - \frac{2h}{\kappa} \sinh(\kappa a) dt$                                              |
| Linear Approx.    | $da = \underbrace{\delta_{R,t} - \delta_{L,t}}_{\text{accumulation}} - \underbrace{\lambda a dt}_{\text{discounting}}$ |

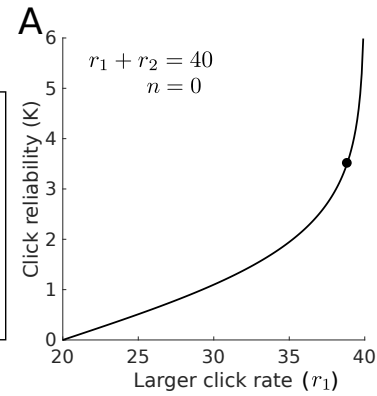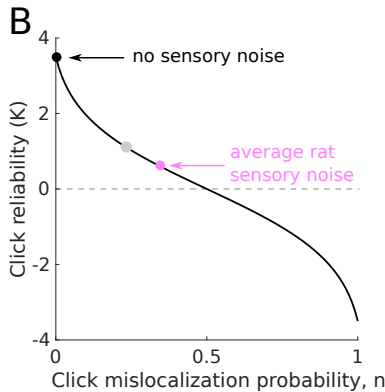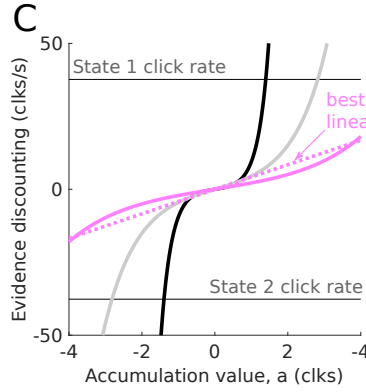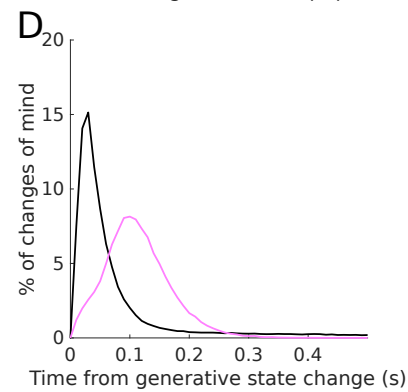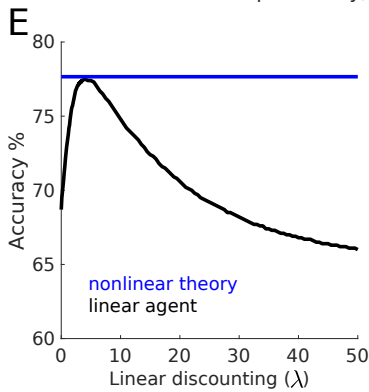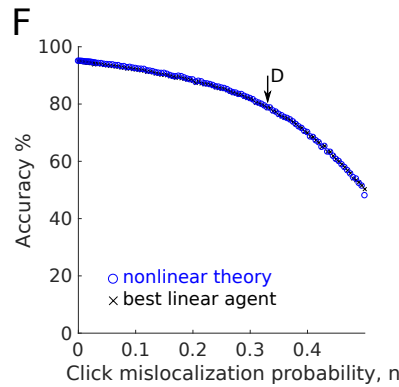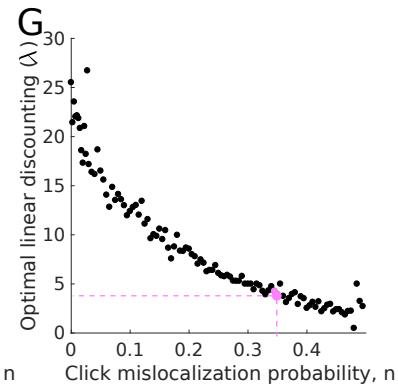

Figure 2: **Optimal discounting rates depends on click reliability and can be well-approximated by linear discounting** (A) The reliability  $\kappa$  of each click depends on the Poisson click rates  $r_1$  and  $r_2$ . If the click rates are very similar, each click is not very informative about the underlying state. Black dot shows the rates used in the study. (B) The reliability of each click also depends on how consistently each click can be correctly localized to the side that generated it. At 50% mislocalization each click contains no information about the current state, so  $\kappa = 0$ . The light pink dot is the average level of sensory noise reported in Brunton 2013. The grey dot is half of the sensory noise in Brunton 2013. (C) Discounting functions for the three sensory noise levels in B (same colors). Increasing sensory noise causes the discounting functions to weaken. Horizontal lines show average clks/sec in each of the two states. (D) Histogram of changes of mind produced by the optimal inference equation. Timing is relative to the last change in the hidden state. (Black) Inference without sensory noise, (pink) inference with average rat level of sensory noise. (E) The optimal nonlinear discounting function can be approximated by a linear discounting function. If the linear discounting function is tuned appropriately, accuracy is close to the full nonlinear function. (F) Comparison between optimal nonlinear discounting function (blue) and the best linear approximation (black), in terms of average accuracy for different noise levels. The best linear approximation is effectively equivalent. Arrow indicates parameter values used in panel D. (G) The best linear discounting rate  $\lambda$  as a function of sensory noise. Increasing sensory noise decreases the discounting rate. The best linear function is found numerically on a set of 30k trials, which produces some variability for different noise levels. Pink dot indicates average rat sensory noise.

200 assigning it to the right). For intuition, consider that if a rat could never tell whether a click was played  
201 from the right or left then each click would never indicate any information about the underlying state.  
202 We can again evaluate the log-evidence term, this time including the probability of click mislocalization  
203 ( $n$ ):

A click on the right

$$\log \frac{(r_1 \Delta t)(1-n)(1-r_2 \Delta t) + (1-r_1 \Delta t)(r_2 \Delta t)(n)}{(r_2 \Delta t)(1-n)(1-r_1 \Delta t) + (1-r_2 \Delta t)(r_1 \Delta t)(n)} = +\kappa(r_1, r_2, n). \quad (10)$$

A click on the left

$$\log \frac{(r_2 \Delta t)(1-n)(1-r_1 \Delta t) + (1-r_2 \Delta t)(r_1 \Delta t)(n)}{(r_1 \Delta t)(1-n)(1-r_2 \Delta t) + (1-r_1 \Delta t)(r_2 \Delta t)(n)} = -\kappa(r_1, r_2, n). \quad (11)$$

204 The terms for no clicks, or clicks on both sides evaluate to 0. As in the case with no sensory noise, the  
205 log-evidence is either 0, or has value  $\kappa$ . We can simplify the expression for  $\kappa$  by letting  $\Delta t \rightarrow 0$ :

$$\kappa(r_1, r_2, n) = \log \frac{r_1(1-n) + r_2 n}{r_2(1-n) + r_1 n}. \quad (12)$$

206 Sensory noise decreases how reliably each click informs the underlying state in the trial, increasing  $n$   
207 decreases  $\kappa$ . If  $n = 0$ , we recover the original  $\kappa$  derived without noise. If  $n = 0.5$ , then each click is  
208 essential heard on a random side, and therefore contains no information so  $\kappa = 0$ . If  $n = 1$ , then  
209 we simply flip the sign of all clicks.

210 Previous studies using the same auditory clicks have shown that rats have significant sensory noise.  
211 Figure 2B shows  $\kappa$  against  $n$ , and highlights the average sensory noise, and corresponding  $\kappa$ , found in  
212 a previous study (Brunton et al., 2013).

213

## 214 **Lower click reliability requires longer integration timescales**

215 The discounting term of equation (9) has  $\kappa$  in the denominator as well as the argument of the sinh term.  
216 As a result, it is not clear how decreasing the click reliability  $\kappa$  changes the behavior of the optimal  
217 inference agent. To gain insight, consider that if evidence is very reliable, accurate decisions can be  
218 made by only using a few clicks from a small time window. However, if evidence is unreliable, a longer  
219 time window must be used to average out unreliable clicks. This intuition is confirmed by plotting  
220 the discounting function for a variety of evidence reliability values (Figure 2C). Decreasing reliability  
221 weakens the evidence discounting term creating longer integration timescales. See the supplementary  
222 materials for more details.

223

## 224 **Evidence discounting leads to changes of mind**

225 The optimal inference equation attempts to predict the hidden state. As the hidden state dynamically  
226 transitions, we expect the inference process to track, albeit imperfectly, the dynamic transitions. From  
227 the perspective of a subject this dynamic tracking leads to changes of mind in the upcoming choice.  
228 Through the optimal inference process we can predict the timing of changes of mind by looking for  
229 times when the sign of the inference process changes ( $\text{sign}(a)$ ). The presence of sensory noise slows the  
230 integration timescale, and thus slows the timing of changes of mind. Figure 2D shows the predicting  
231 timing of changes of mind with and without sensory noise.

232

## 233 **Linear approximation to nonlinear discounting function is very accurate**

234 The full nonlinear discounting function ( $-\frac{2h}{\kappa} \sinh(\kappa a)$ ), is complicated. In order to aid our analysis of  
235 rat behavior, we will consider a linear approximation to the discounting function ( $-\lambda a$ ), where  $\lambda$  gives  
236 the discounting rate. There are many possible linear approximations with different slopes. A linear  
237 approximation using the slope of  $\sinh$  at the origin will fail to capture the strong discounting farther  
238 from the origin. We found the best linear approximation numerically.

239 Figure 2E shows, for a particular noise level and click rates, the accuracy of a range of linear  
240 discounting agents against the full nonlinear agent. If  $\lambda$  is tuned correctly, the linear agent accuracy  
241 is very close to the full nonlinear function. We find this to be true across a wide range of noise values  
242 (Figure 2F). While the optimal linear strength at each noise level changes (Figure 2G), the accuracy is  
243 always very close to that of the full nonlinear theory. It is important to note that a linear approximation  
244 in general will not always be close in accuracy to the full nonlinear theory, but for our specific click  
245 rate parameters it is an accurate approximation. See Veliz-Cuba et al. 2016 for examples of evidence  
246 statistics for which the linear approximation does not fit as well.

247 Given that a linear discounting function matches the accuracy of the full nonlinear model, we will  
248 analyze rat evidence discounting behavior by looking for the appropriate discounting rate or equivalently  
249 the appropriate integration timescale. Specifically, we will compare the rat behavior to this linear  
250 discounting equation:

$$da = \delta_{R,t} - \delta_{L,t} - \lambda a dt, \quad (13)$$

251 where  $\lambda$  is the discounting rate and  $\frac{1}{\lambda}$  is the integration timescale. We did not examine whether rats  
252 demonstrate nonlinear evidence discounting because the linear approximation in our task is effectively  
253 indistinguishable from the full nonlinear theory.

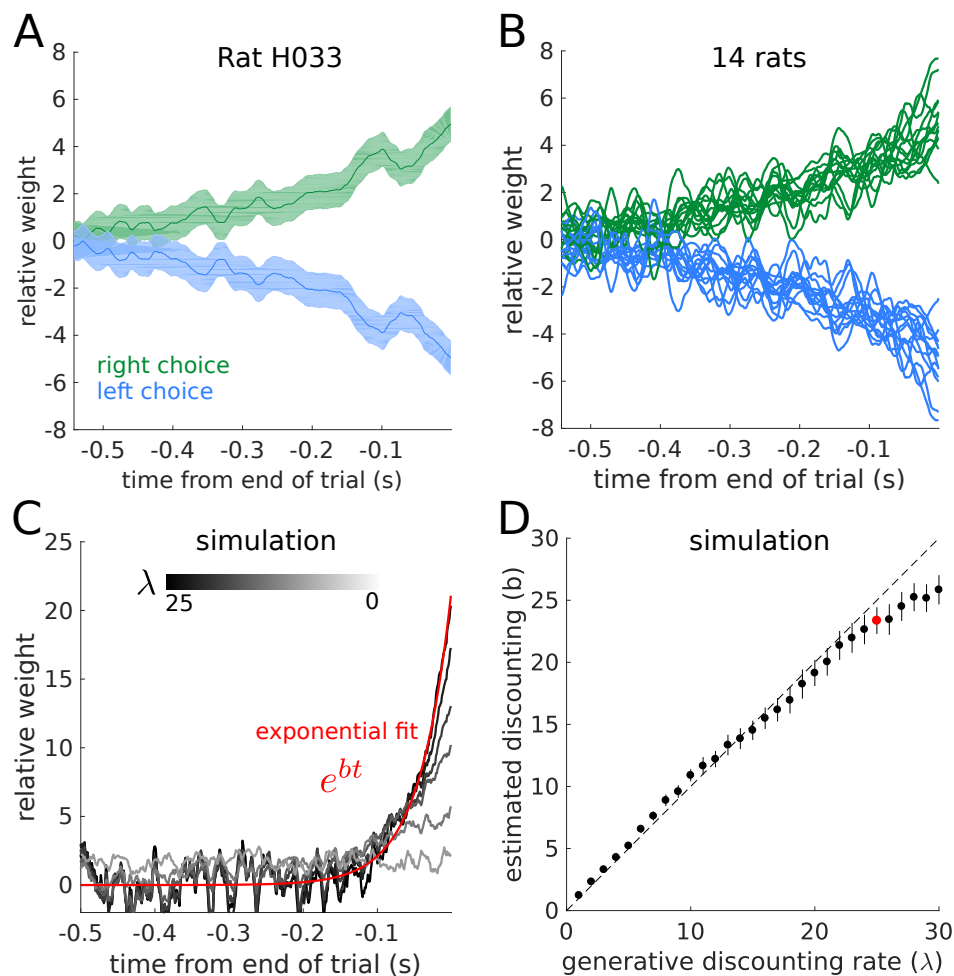

Figure 3: **Rats discount evidence.** (A) Reverse correlation curves for an example rat reveals how clicks at each time point influence the rat’s decision. (B) Reverse correlation curves for 14 rats. Error bars are omitted for clarity. (C) Reverse correlation curves for a range of simulated linear discounting agents. Black to white lines indicate increasing discounting rates ( $\lambda$ ). Only the reverse correlation curve for the right choice are shown for clarity. Each curve was fit with an exponential function (example red). The fit parameters are used in part D. (D) Exponential fit to each discounting agent recovers the generative linear discounting rate. Example in part C show with red dot.

254

### 255 Psychophysical reverse correlation reveals the integration timescale

256 Psychophysical reverse correlation is a commonly used statistical method to find what aspects of a  
257 behavioral stimulus influence a subject’s choice. Here we use reverse correlation to find the integration  
258 timescale used by the rats. We then normalized the reverse correlation curve to have an area under  
259 the curve equal to one. This step lets the curves be interpreted in units of effective weight at each  
260 time point. A flat reverse correlation curve indicates even weighting of evidence across all time points.  
261 Previous studies in a static environment find rats with flat reverse correlation curves (Brunton et al.,  
262 2013; Hanks et al., 2015; Erlich et al., 2015). Figure 3A shows the reverse correlation for an example  
263 rat in a dynamic environment. The stimulus earlier in the trial is weighted less than the stimulus at  
264 the end of the trial indicating evidence discounting. Figure 3B shows the mean reverse correlations

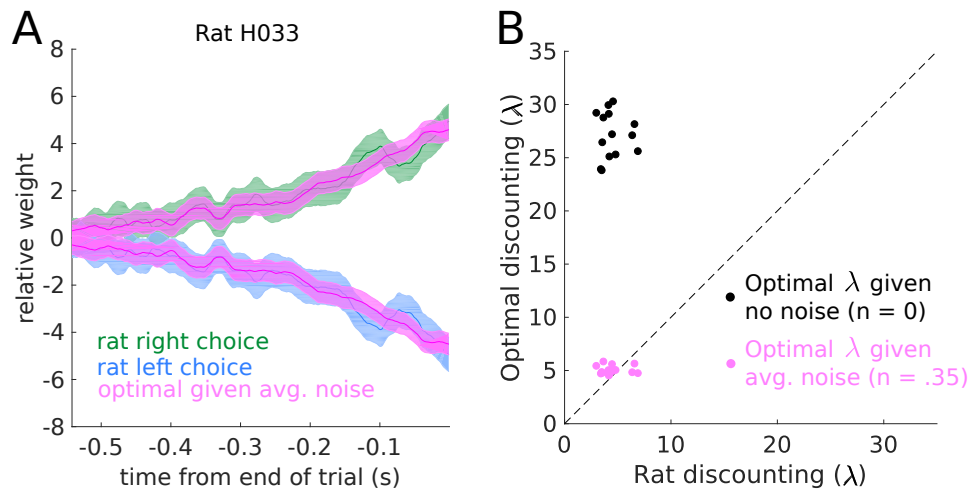

Figure 4: **Rats optimally discount evidence.** (A) Example reverse correlation curve for one rat, and the reverse correlation curve from the optimal inference agent with the average rat sensory noise. The optimal inference agent was simulated on the same trials the rat performed. (B) Quantification of discounting timescales. When factoring average sensory noise, the rats adopt the optimal timescale. The variability in optimal discounting rates is a result of measuring the reverse correlation curves on a different set of trials each rat actually performed.

265 for all rats in the study. Figure 3C shows the reverse correlation curves from a family of linear dis-  
266 counting agents ( $da = \delta_R - \delta_L - \lambda dt$ ), with  $\lambda$  ranging from 0 to 30. The curves were generated from  
267 a synthetic dataset of 20,000 trials. The weaker the discounting rate, the flatter the reverse correla-  
268 tion curves. To quantify the discounting timescale from the reverse correlation curves, an exponential  
269 function  $e^{bt}$  was fit to each curve. The parameter  $b$  reliably recovers the discounting rate  $\lambda$  (Figure 3D).

270

### 271 **Rats adapt to the optimal timescale**

272 To compare each rat's evidence discounting timescale to the optimal inference equation, we simulated  
273 the optimal inference agent on the trials each rat experienced. We then computed the reverse correlation  
274 curves for both the rats and the optimal agent (Figure 4A). To quantitatively compare timescales, we  
275 then fit an exponential function to each of the reverse correlation curves. Rat behavior was compared  
276 with two optimal agents. The first optimal agent assumes no sensory noise; while the second agent uses  
277 the optimal timescale given the average level of sensory noise across rats reported in Brunton et al. 2013  
278 (Figure 4B). When the average level of sensory noise is taken into account, the rats match the optimal  
279 timescale. The reverse correlation analysis shows that rats are close to optimal given the average level  
280 of sensory noise in a separate cohort of rats.

281

### 282 **A quantitative behavioral model captures rat behavior**

283 In order to extend our analysis to examine individual variations in noise level and integration timescales,  
284 we fit a behavioral accumulation of evidence model from the literature to each rat (Brunton et al., 2013;

285 Hanks et al., 2015; Erlich et al., 2015). This model generates a moment-by-moment estimate of a latent  
286 accumulation variable. The dynamical equations for the model are given by:

$$da = (\delta_{R,t} \cdot \eta_R \cdot C - \delta_{L,t} \cdot \eta_L \cdot C) dt - \lambda a dt + \sigma_a dW, \quad (14)$$

$$\frac{dC}{dt} = \frac{1 - C}{\tau_\phi} + (\phi - 1) C (\delta_{R,t} + \delta_{L,t}). \quad (15)$$

287 At each moment in a trial, the model generates a distribution of possible accumulation values  $P(a|t, \delta_R, \delta_L)$ .  
288 In addition to the click integration and linear discounting that was present in our normative theory,  
289 this model also parameterizes many possible sources of noise. Each click has multiplicative Gaussian  
290 sensory noise,  $\eta_{L/R} = \mathcal{N}(1, \sigma_s^2)$ . In addition to the sensory noise, each click is also filtered through  
291 an adaptation process,  $C$ . The adaptation process is parameterized by the adaptation strength  $\phi$ , and  
292 a adaptation time constant  $\tau_\phi$ . If  $\phi > 1$  the model has facilitation of sequential clicks, and if  $\phi < 1$   
293 the model has depression of sequential clicks. The accumulation variable  $a$  also undergoes constant  
294 additive Gaussian noise  $\sigma_a$ . Finally, the initial distribution of  $a$  has some initial variance given by  $\sigma_i$ .  
295 See Brunton et al. 2013 for details on the development and evaluation of this model. One major modi-  
296 fication to the model from previous studies is the removal of the sticky bounds  $B$ , which are especially  
297 detrimental to subject performance given the dynamic nature of the task. This model is a powerful tool  
298 for the description of behavior on this task because of its flexibility at characterizing many different  
299 behavioral strategies (Brunton et al., 2013; Hanks et al., 2015; Erlich et al., 2015).

300 The model was fit to individual rats by maximizing the likelihood of observing the rat's choice  
301 on each trial. To evaluate the model, we can compare the reverse correlation curves from the model  
302 and subject. Figure 5A shows the comparison for an example rat, showing that the model captures  
303 the timescale of evidence discounting seen by the reverse correlation analysis. See the supplemental  
304 materials for residual error plots for each rat.

305 In order to analyze the model fits we can examine the best fit parameters for each rat, and compare  
306 them to rats trained on the static version of the task (from Brunton et al. 2013). The evidence dis-  
307 counting strength parameter  $\lambda$  shows a striking difference between the two rat populations (Figure 5B).  
308 In the static task, the rats have small discounting rates indicating an integration timescale comparable  
309 to the longest trial the rats experienced (Brunton et al., 2013; Hanks et al., 2015; Erlich et al., 2015).  
310 In the dynamic task, the rats have strong evidence discounting, consistent with the reverse correlation  
311 analysis. See the supplemental materials for a comparison of other model parameters.

312 To assess whether rats individually calibrate their discounting timescales to their level of sensory  
313 noise, we estimate the sensory noise level from the model parameters. We estimated the click mislo-  
314 calization probability by taking the average level of adaptation, and the Gaussian distributed sensory

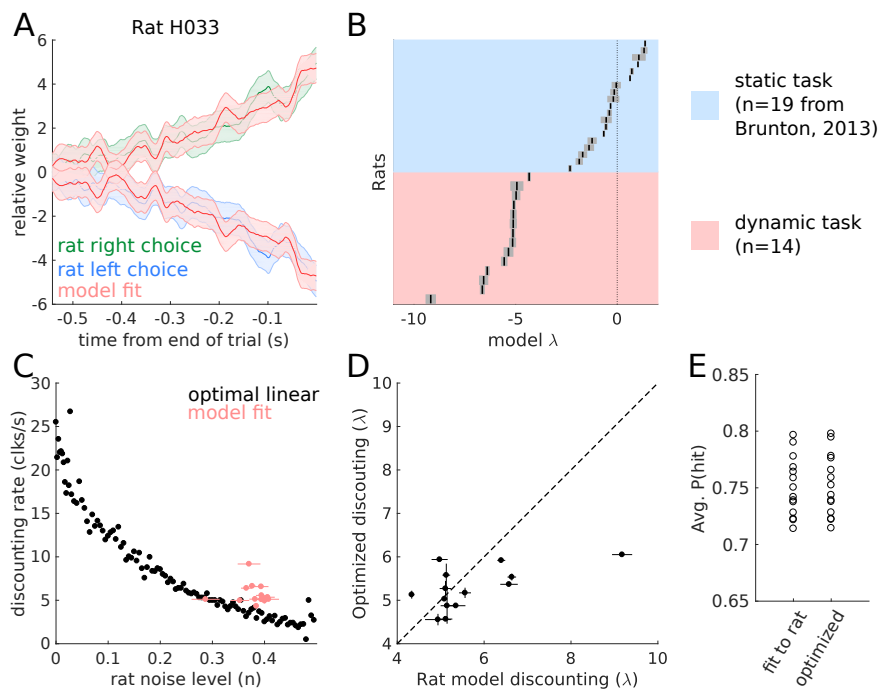

Figure 5: **Quantitative model captures rat behavior, and shows optimal discounting** (A) Example reverse correlation curves generated by the quantitative model compared with a rat’s behavior. (B) Best fitting discounting rates for rats trained on the dynamic task (orange), and for rats trained in a static environment (blue, data and fits from *Brunton, 2013*). (C) Each rat’s noise level and discounting rate compared to the optimal trade-off. (D) Each rat’s evidence discounting parameter compared to the accuracy maximizing discounting level. (E) The average accuracy for the model fit to each rat’s behavior, and optimized to maximize accuracy.

315 noise. Figure 5C shows each rat’s fit compared to the numerically obtained optimal discounting lev-  
 316 els from Figure 2F. The rats appear to have slightly larger discounting rates than predicted by the  
 317 normative theory. The deviation from the normative theory may be due to other parameters in the  
 318 behavioral model, the fact that we considered only the average level of sensory adaptation, or other  
 319 factors. In order to more directly examine whether the rats were adopting the optimal timescale, we  
 320 asked whether the rat’s discounting rates were constrained by the other model parameters. For each  
 321 rat, we took the best fitting model parameters, and froze all parameters except the discounting rate  
 322 parameter  $\lambda$ . Then, we found the value of  $\lambda$  that maximized accuracy on the trials each rat performed.  
 323 Note this optimization did not ask to maximize the similarity to the rat’s behavior. We found that  
 324 given the other model parameters, the accuracy maximizing discounting level was very close to the  
 325 rat’s discounting level (Figure 5D) meaning that different sources of noise parametrized in the model  
 326 highly constrain the rats’ discounting rates. Further, while the discounting rates changed slightly, the  
 327 improvement in total trial accuracy changed even less. For all rats, optimizing the discounting rate  
 328 increased the total accuracy of the model by less than 1% (Figure 5E). Taken together these results  
 329 suggest that rats discount evidence at the optimal level given several sources of noise.

330

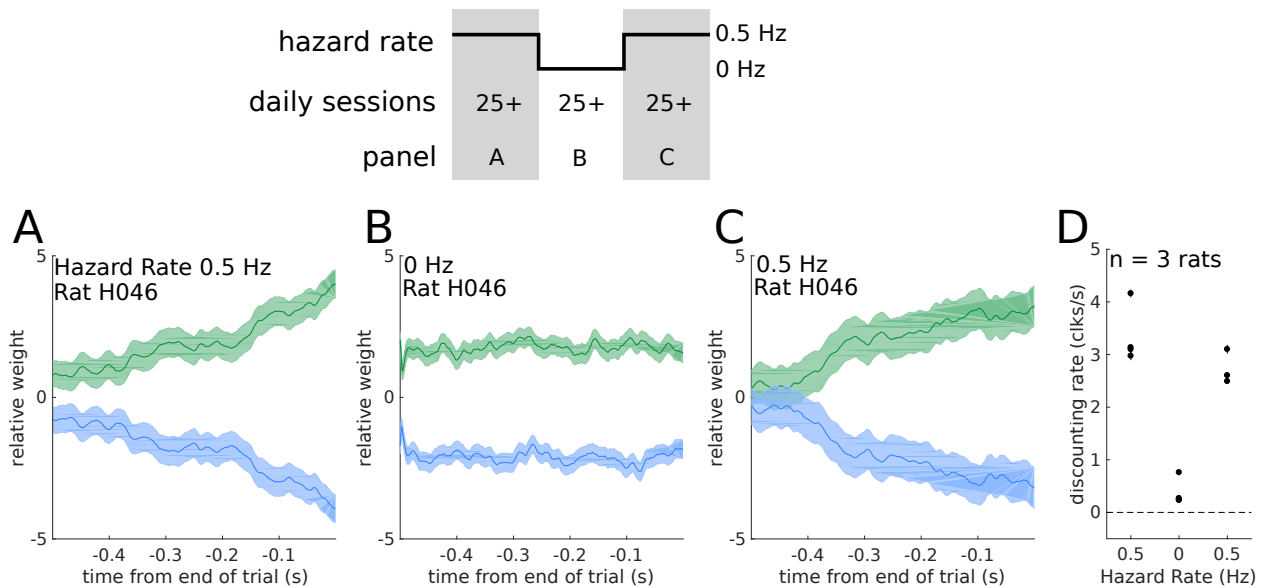

Figure 6: **Rats adapt to changing environmental conditions.** Three rats were moved from a 0.5 hz hazard rate to 0 hz, then back to 0.5 hz. Rats stayed in each environment for multiple daily training sessions, with a minimum of 25 sessions. (Top) Schematic outlining the experimental design. (A-C) Reverse correlation curves for an example rat in a (A) 0.5 Hz hazard rate environment before switching, (B) 0 Hz environment, and (C) 0.5 Hz environment after switching. (D) Quantification of the integration timescales before, during, and after the switch for all rats.

### 331 Individual rats in different environments

332 Previous studies have demonstrated that rats can optimally integrate evidence in a static environment  
 333 (Brunton 2013). Here we have demonstrated that rats can optimally integrate and discount evidence in  
 334 a dynamic environment. In order to demonstrate the ability of individual rats to adapt their timescales  
 335 in different environments, we moved three rats from a dynamic environment ( $h = 0.5$  Hz) to a static  
 336 environment ( $h = 0$  Hz), and then back. The rats trained in each environment for many daily sessions  
 337 (minimum 25 sessions). In each environment, we quantified their behavior using reverse correlation  
 338 methods. Figure 6A-C show the reverse correlation curves for an example rat as the rat transitioned  
 339 between environments with different statistics. Figure 6D shows the integration timescales for each rat  
 340 in each environment. Rats rapidly adjusted their timescales when moving into a static environment, a  
 341 session-by-session estimate is in the supplementary materials Figure 23. Consistent with our normative  
 342 theory, rats in the  $h = 0.5$  Hz environment show discounting rates approximately half the strength of  
 343 rats in the  $h = 1$  Hz environment. We find rats can dynamically adjust their integration behavior to  
 344 match their environments.

345

### 346 Discussion

347 We have developed a pulse-based auditory decision making task in a dynamic environment. Using a  
 348 high-throughput automated rat training, we trained rats to accumulate and discount evidence in a dy-



349 namic environment. Extending results from the literature (Veliz-Cuba et al., 2016), we formalized the  
350 optimal behavior on our task, which critically involves discounting evidence on a timescale proportional  
351 to the environmental volatility and the reliability of each click. The reliability of each click depends on  
352 the experimenter imposed click statistics, and each rat’s sensory noise. We find that once sensory noise  
353 is taken into account, the rats have timescales consistent with the optimal inference process. We used  
354 quantitative modeling to investigate rat to rat variability, and to predict a moment-by-moment estimate  
355 of the rats’ accumulated evidence. Finally, we demonstrated rats can rapidly adjust their discounting  
356 behavior and respectively their integration timescales in response to changing environmental statistics.  
357 Our findings open new questions into complex rodent behavior and the underlying neural mechanisms  
358 of decision making.

359

360 Previously accumulation of evidence has been studied in a static stationary environment . These  
361 studies have given behavioral and neural insights into the ability of rats, monkeys, and humans to  
362 optimally accumulate evidence over extended timescales (Brunton et al., 2013; Kira et al., 2015; Pur-  
363 cell et al., 2010; Philiastides et al., 2011; Lee and Cummins, 2004; Kelly and O’Connell, 2013; Gold  
364 and Shadlen, 2001). These studies have showed that rats or primates, like humans, can gradually  
365 accumulate evidence for decision-making, and that their evidence accumulation process timescale is op-  
366 timal. Quantitative modeling revealed that errors originated from sensory noise, not from the evidence  
367 accumulation process. The optimal strategy in the stationary environment is perfect integration. A  
368 natural extension of the static version of the task is a setting in which the environment changes with  
369 some defined statistics and this what we aimed to do in our ”dynamic clicks task”. In the dynamics  
370 clicks task, the optimal strategy involves discounting evidence at a rate proportional to the volatility  
371 of the environment and the reliability of each evidence pulse. The behavioral quantitative modeling  
372 builds on a study that derived ideal observer models for dynamic environments, including the two-state  
373 environments considered here, and more complex environments (Veliz-Cuba et al., 2016). That study  
374 analyzed the behavior of ideal agents with Gaussian distributed evidence samples. Our work builds  
375 on their derivation of ideal behavior, and extends their analysis to discrete evidence. Importantly, our  
376 analysis allowed us to separate evidence reliability into experimenter imposed stimulus statistics and  
377 sensory noise. Moreover, our findings show that rats discounting rates are optimal only when factoring  
378 in sensory noise. We have also shown that rats can switch back and forth between environments with  
379 different volatilities thus providing for the first time a knob for the experimenter to control the subjects’  
380 integration timescale.

381 On the other hand, a recent study examined human decision making in a dynamic environment

382 (Glaze et al., 2015). That study found that humans show nonlinear evidence discounting, but their dis-  
383 counting rates did not match with the optimal inference. Incorporating models of human sensory noise  
384 could explain deviations from optimality in their data. We did not examine whether rats demonstrate  
385 nonlinear evidence discounting because the linear approximation in our task is effectively indistinguish-  
386 able from the full nonlinear theory (Figure 2). Other studies in humans have also found that humans  
387 perform leaky integration in dynamic environments (Ossmy et al., 2013).

388 The behavior presented here is distinct from previous tasks that have investigated decision making  
389 over time. Cisek et al. 2009 developed an evidence accumulation task in which the amount of evidence  
390 changes over the course of the trial. However, in that study the evidence is generated from a stationary  
391 process and the optimal behavior is to perfectly integrate all evidence. This is in contrast to the present  
392 study that examines conditions under which the optimal behavior is to discount old evidence.

393 In a separate line of work called bandit tasks, the subject gets reward or feedback on a timescale  
394 slower than the dynamics of the environment (Iigaya et al., 2017; Miller et al., 2017). In bandit tasks,  
395 the environment changes slowly with respect to each choice, and subjects get many opportunities for  
396 reward and feedback before the environment changes. In the work presented here, the subjects must  
397 perform inference without feedback while the dynamics of the environment are changing within the  
398 course of one trial. Importantly, in our task the environmental state “resets” after each choice the rat  
399 makes.

400 The dynamic accumulation of evidence task that we are presenting here should not also be confused  
401 with the conventional change detection tasks, which have only a single change of mind. In our case, we  
402 have many changes of mind that are happening stochastically. See Fig 2 in Veliz-Cuba et al. 2016 for  
403 a detailed discussion on the relationship between these tasks.

404 It is very important to note that the term “evidence discounting” is different than “temporal  
405 discounting” prominently used in the reinforcement learning literature. Temporal discounting is the  
406 phenomenon in which the subjective value of some reward decreases in magnitude when the given reward  
407 is delayed (Dayan and Abbott, 2005, pg.352). In our case, evidence discounting is the phenomenon in  
408 which an agent discards evidence in order to infer state changes in the environment.

409 One benefit of rodent studies is the wide range of experimental tools available to investigate the  
410 neural mechanisms underlying behavior. Our task will facilitate the investigation of two neural mech-  
411 anisms. First, due to the dynamic nature of each trial, subject’s change their mind often during each  
412 trial allowing experimental measurement of changes of mind within one trial. Further, these changes of  
413 mind are driven by internal estimates of accumulated evidence. Previous studies of rat decision making  
414 have identified a cortical structure, the Frontal Orienting Fields (FOF) as a potential substrate for

415 upcoming choice memory (Erlich et al., 2011; Hanks et al., 2015; Erlich et al., 2015; Kopec et al., 2015;  
416 Piet et al., 2017). Future work could investigate if and how the FOF tracks upcoming choice in a dy-  
417 namic environment during changes of mind. It will also complement already existing neurophysiological  
418 studies of changes of mind (Kiani et al., 2014; Peixoto et al., 2016)

419 Second, normative behavior in a dynamic environment requires tuning the timescale of evidence in-  
420 tegration to the environmental volatility. There is a large body of experimental and theoretical studies  
421 on neural integrators (Seung, 1996; Goldman, 2009; Aksay et al., 2007; Scott et al., 2017) that inves-  
422 tigate how neural circuits potentially perform integration. Many possible neural circuit mechanisms  
423 have been proposed, from random unstructured networks (Maass et al., 2002; Ganguli et al., 2008),  
424 feed-forward syn-fire chains (Goldman, 2009), and recurrent structured networks of many forms (Seung,  
425 1996; Druckmann and Chklovskii, 2012; Boerlin et al., 2013). The task developed here allows for ex-  
426 perimental control of the putative neural integrator's timescale within the same subject. Measurement  
427 of neural activity in different dynamic environments, and thus different integration timescales, may  
428 shed light into which mechanisms are used in neural circuits for evidence integration. For instance, un-  
429 structured networks, or feed-forward networks may re-tune themselves via adjusting read-out weights.  
430 Networks that integrate via recurrent dynamics; however, would re-tune themselves via changes in those  
431 recurrent dynamics. Alternatively, measurement of neural activity in different dynamic environments  
432 may reveal fundamentally new mechanisms of evidence integration. For instance, Erlich et al. 2015  
433 proposed multiple integration networks with different timescales to account for behavioral changes in  
434 response to prefrontal cortex inactivations. Our task may allow further investigation into the structure  
435 and dynamics of neural integrators.

436

## 437 **Methods**

### 438 **Subjects**

439 Animal use procedures were approved by the Princeton University Institutional Animal Care and Use  
440 Committee and carried out in accordance with NIH standards. All subjects were adult male Long  
441 Evans rats (Vendor: Taconic and Harlan, USA) placed on a controlled water schedule to motivate them  
442 to work for a water reward.

443

### 444 **Behavioral Training**

445 We trained 14 rats on the dynamic clicks task (Figure 1). Rats went through several stages of an  
446 automated training protocol. In the final stage, each trial began with an LED turning on in the center  
447 nose port indicating to the rats to poke there to initiate a trial. Rats were required to keep their nose

448 in the center port (nose fixation) until the light turned off as a “go” signal. During center fixation,  
449 auditory cues were played indicating the current hidden state. The duration of the fixation period (and  
450 stimulus period) ranged from 0.5 to 2 seconds. After the go signal, rats were rewarded for entering  
451 the side port corresponding to the hidden state at the end of the stimulus period. The hidden state  
452 did not change after the go signal. A correct choice was rewarded with 24 microliters of water; while  
453 an incorrect choice resulted in a punishment noise (spectral noise of 1 kHz for a 0.7 seconds duration).  
454 The rats were put on a controlled water schedule where they receive at least 3% of their weight every  
455 day. Rats trained each day in a training session on average 120 minutes in duration. Training sessions  
456 were included for analysis if the overall accuracy rate exceeded 70%, the center-fixation violation rate  
457 was below 25%, and the rat performed more than 50 trials. In order to prevent the rats from develop-  
458 ing biases towards particular side ports an anti-biasing algorithm detected biases and probabilistically  
459 generated trials with the correct answer on the non-favored side.

460

#### 461 **Linear discounting agents**

462 To analyze the performance of linear discounting agents at varying levels of noise, we created synthetic  
463 noisy-datasets. For each level of click noise, each click switched sides according to the noise level. On  
464 each of these datasets, we numerically optimized the discounting level that maximized the accuracy of  
465 predicting the hidden state at the end of the trial.

466

#### 467 **Psychophysical reverse correlation**

468 The computation of the reverse correlation curves was very similar to methods previously reported  
469 (Brunton et al., 2013; Hanks et al., 2015; Erlich et al., 2015). However, one additional step is included  
470 to deal with the hidden state. The first step is to smooth the click trains on each trial with a causal  
471 Gaussian filter ( $k(t)$ ), this creates one smooth click rate for each trial. The filter had a standard  
472 deviation of 5 msec.

$$r_i(t) = \delta_{R,t} * k(t) - \delta_{L,t} * k(t) \quad (16)$$

473 Then, the smooth click rate on each trial was normalized by the expected click rate for that time step,  
474 given the current state of the environment. This gives us the deviation (the excess click rate) from the  
475 expected click rate for each trial.

$$e_i(t) = r_i(t) - \langle r(t) | S_i(t) \rangle \quad (17)$$

476 Finally, we compute the choice triggered average of the excess click rate by averaging over trials based  
 477 on the rat's choice.

$$\text{excess-rate}(t|\text{choice}) = \langle e(t)|\text{choice} \rangle \quad (18)$$

478 The excess rate curves were then normalized to integrate to one. This was done to remove distorting  
 479 effects of a lapse rate, as well to make the curves more interpretable by putting the units into effective  
 480 weight of each click on choice. To quantify the timescale of the reverse correlation curves, we fit an  
 481 exponential of the form  $ae^{bt}$  to each curve. The parameter  $b$  is the discounting rate, while  $1/b$  is the  
 482 integration timescale.

483

### 484 Behavioral Model

485 Previous studies using this behavioral accumulation of evidence model (Brunton et al., 2013) have  
 486 included sticky bounds which absorb probability mass when the accumulated evidence reaches a certain  
 487 threshold. We found this sticky bounds to be detrimental to high performance on our task, so we  
 488 removed them. The removal of the sticky bounds facilitates an analytical solution of the model. The  
 489 model assumes an initial distribution of accumulation values  $P(a|t=0) = \mathcal{N}(\mu_0, \sigma_i^2)$ . At each moment  
 490 in the trial, the distribution of accumulation values  $P(a|t, \delta_R, \delta_L)$  is Gaussian distributed with mean  
 491 ( $\mu$ ) and variance ( $\sigma^2$ ) given by:

$$\mu(t) = \mu_0 e^{\lambda t} + \int_0^t (\delta_{R,s} \cdot C(R(s)) - \delta_{L,s} \cdot C(L(s))) ds \quad (19)$$

$$\mu(t) = \mu_0 e^{\lambda t} + \sum_i^{\#R} e^{\lambda(t-R(i))} C(R(i)) - \sum_i^{\#L} e^{\lambda(t-L(i))} C(L(i)) \quad (20)$$

$$\sigma^2(t) = \sigma_i^2 e^{\lambda t} + \frac{\sigma_a^2}{2\lambda} (e^{2\lambda t} - 1) + \int_0^t \sigma_s^2 (\delta_{R,s} \cdot C(R(s)) - \delta_{L,s} \cdot C(L(s)))^2 e^{2\lambda t} ds \quad (21)$$

$$\sigma^2(t) = \sigma_i^2 e^{\lambda t} + \frac{\sigma_a^2}{2\lambda} (e^{2\lambda t} - 1) + \sum_i^{\#R} \sigma_s^2 C(R(i))^2 e^{2\lambda(t-R(i))} + \sum_i^{\#L} \sigma_s^2 C(L(i))^2 e^{2\lambda(t-L(i))} \quad (22)$$

492 Where  $\#R$  is the number of right clicks on this trial up to time  $t$ , and  $R(i)$  is the time of the  $i^{\text{th}}$  right  
 493 click.  $C(R(i))$  tells us the effective adaptation for that clicks. For a detailed discussion of a similar  
 494 model, see Feng et al. 2009.

495 Given a distribution of accumulation values  $P(a|t, \delta_R, \delta_L) = \mathcal{N}(\mu(t), \sigma^2(t))$ , and the bias parameter

496  $B$ , we can compute the left and right choice probabilities by:

$$P(\text{go right}) = \frac{1}{2} \left( 1 + \operatorname{erf} \left( \frac{-(B - \mu(t))}{\sigma\sqrt{2}} \right) \right), \quad (23)$$

$$P(\text{go left}) = 1 - P(\text{go right}). \quad (24)$$

497 These choice probabilities are then distorted by the lapse rate, which parameterizes how often a rat  
498 makes a random choice. The model parameters  $\theta$  were fit to each rat individually by maximizing the  
499 likelihood function:

$$L = \prod_i^{\#\text{trials}} P(\text{rat's choice on trial } i | \theta, \delta_R^i, \delta_L^i). \quad (25)$$

500 Additionally, a half-gaussian prior was put on the initial noise ( $\sigma_i$ ) and accumulation noise parameters  
501 ( $\sigma_a$ ). Due to the presence of large discounting rates, these parameters are difficult to recover in syn-  
502 thetic datasets. The priors were set to match the respective best fit values from Brunton et al. 2013.  
503 The numerical optimization was performed in MATLAB. To estimate the uncertainty on the parameter  
504 estimates, we used the inverse hessian matrix as a parameter covariance matrix (Daw, 2011). To com-  
505 pute the hessian of the model, we used automatic differentiation to exactly compute the local curvature  
506 (Revels et al., 2016).

507

### 508 **Calculating noise level from model parameters**

509 Given the model parameters ( $\sigma_s^2$ ,  $\phi$ , and  $\tau_\phi$ ), we computed the average level of sensory adaptation on  
510 each click  $\langle C \rangle$ . Then, we computed what fraction of the probability mass would cross 0 to be registered  
511 as a click on the other side.

$$n = \frac{1}{2} \left( 1 + \operatorname{erf} \left( \frac{-\langle C \rangle}{\sqrt{2\sigma_s^2 \langle C \rangle}} \right) \right). \quad (26)$$

512

513

## 514 **Acknowledgements**

515 We thank all members of the Brody lab for technical assistance, and feedback throughout the project.  
516 We thank Ben Scott, Diksha Gupta, Tim Hanks, and Christine Constantinople for detailed comments  
517 on the manuscript. This work was supported in part by NIH grant 5-R01-MH108358

518

## 519 **Author Contributions**

520 AP: Task design, rat training, theoretical analysis, quantitative methods development and application.  
521 AE: Task design, rat training, and advised during all aspects of the study. CB: advised during all  
522 aspects of the study

## 523 **Supplementary Materials**

524 The supplementary materials contains extended figures and control analyses for several aspects of the  
525 study:

- 526 1. Individual rat behavior and training
- 527 2. Optimal inference details and derivation
- 528 3. Sensory noise parameterization details and alternatives
- 529 4. Psychophysical reverse correlation details
- 530 5. Quantitative model details

531

## 532 **Individual Rat Behavior**

533 In this section we outline our rat training process, and then provide several model free analyses of  
534 behavior for each rat individually. First, we include the psychometric curve with respect to the total  
535 click difference on each trial. Second, we include the psychometric curve with respect to the optimal  
536 inference process (assuming no sensory noise). Third, the chronometric plot shows rat accuracy with  
537 respect to time since the last hidden state change. Fourth, the chronometric plot with respect to total  
538 trial duration. Fifth, the reverse correlation curves with best fit exponential for each rat.



## 539 Training procedure details

540 The training process for the Dynamic Clicks task involves “classical” training during which the rats  
541 learn to associate ports with rewards. The “classical” pipeline is the same as Duan et al. 2015. After  
542 completing classical training, then rats then learn the standard Poisson clicks task as described in  
543 Brunton et al. 2013. Finally, environmental state switching is introduced. The following tables outline  
544 keep changes at each stage in the procedure. Rats typically spend a few days on classical, and about 6  
545 weeks moving through the clicks training.

### 546 Classical Training:

|       | Stage Name                         |
|-------|------------------------------------|
| 547 1 | learn left poking                  |
| 2     | learn right poking                 |
| 548 3 | learn center poke switching blocks |

### 549 Dynamic Clicks Training:

|       | Stage Name                     | h    | $\gamma$ | T | $\Delta T$ |
|-------|--------------------------------|------|----------|---|------------|
| 1     | grow nose in center 1          | 0    | 5        | 1 | 0          |
| 2     | wait for good endpoints        | 0    | 5        | 1 | 0          |
| 3     | grow nose in center 2          | 0    | 5        | 2 | 0          |
| 4     | wait for good endpoints        | 0    | 5        | 2 | 0          |
| 5     | add variable trial length      | 0    | 5        | 2 | 0.5        |
| 550 6 | wait for good endpoints        | 0    | 5        | 2 | 0.5        |
| 7     | step hazard 1                  | 1 Hz | 5        | 2 | 0.5        |
| 9     | increase variable trial length | 1    | 5        | 2 | 1.5        |
| 10    | add psychometrics 1            | 1    | 4        | 2 | 1.5        |
| 11    | add psychometrics 2            | 1    | 3.5      | 2 | 1.5        |
| 12    | add psychometrics 3            | 1    | 3.2      | 2 | 1.5        |
| 13    | add psychometrics 4            | 1    | 3        | 2 | 1.5        |
| 14    | final                          | 1    | 3        | 2 | 1.5        |

551 **Notes:** **h** is the hazard rate between states. **H** is introduced in stage 9, increased in stage 10, and  
552 is constant afterwards. **Gamma** ( $\gamma$ ) is the log of the click rates.  $\gamma = 5$  is the setting for endpoints,  
553 which is extremely easy. **T** is the maximum duration of the stimulus period.  $\Delta T$  is the variability in  
554 stimulus period duration. If the trial length (T) is 2 seconds, and  $\Delta T$  is 0.5, that means trials are 1.5  
555 - 2 seconds in length.

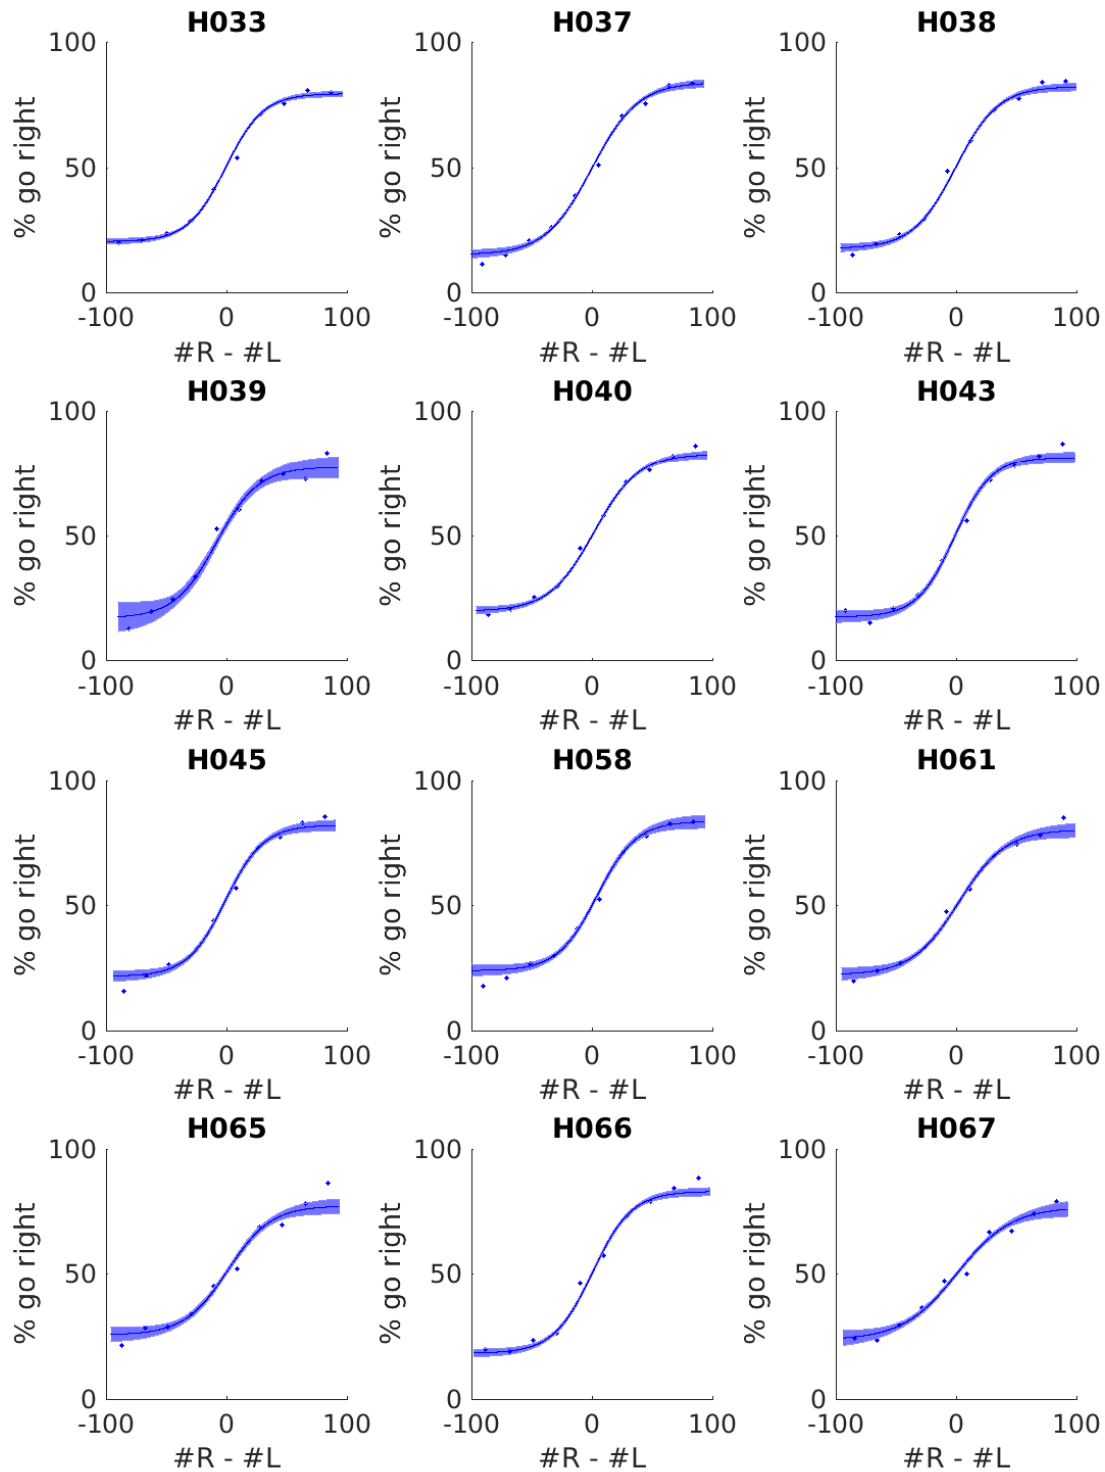

Figure 7: **Psychometric graph for all rats** Each trial performed by the rat was binned by the total click difference in the trial. The rat's average accuracy in each bin is shown (dots). A four parameter logistic function is fit to the data with 95% confidence intervals (line).

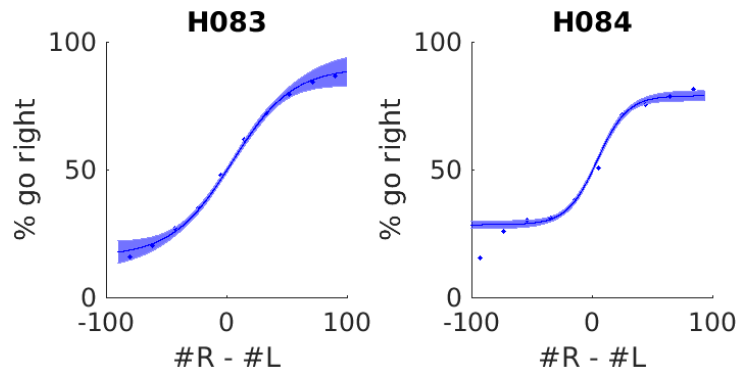

Figure 8: **Psychometric graph for all rats** Each trial performed by the rat was binned by the total click difference in the trial. The rat's average accuracy in each bin is shown (dots). A four parameter logistic function is fit to the data with 95% confidence intervals (line).

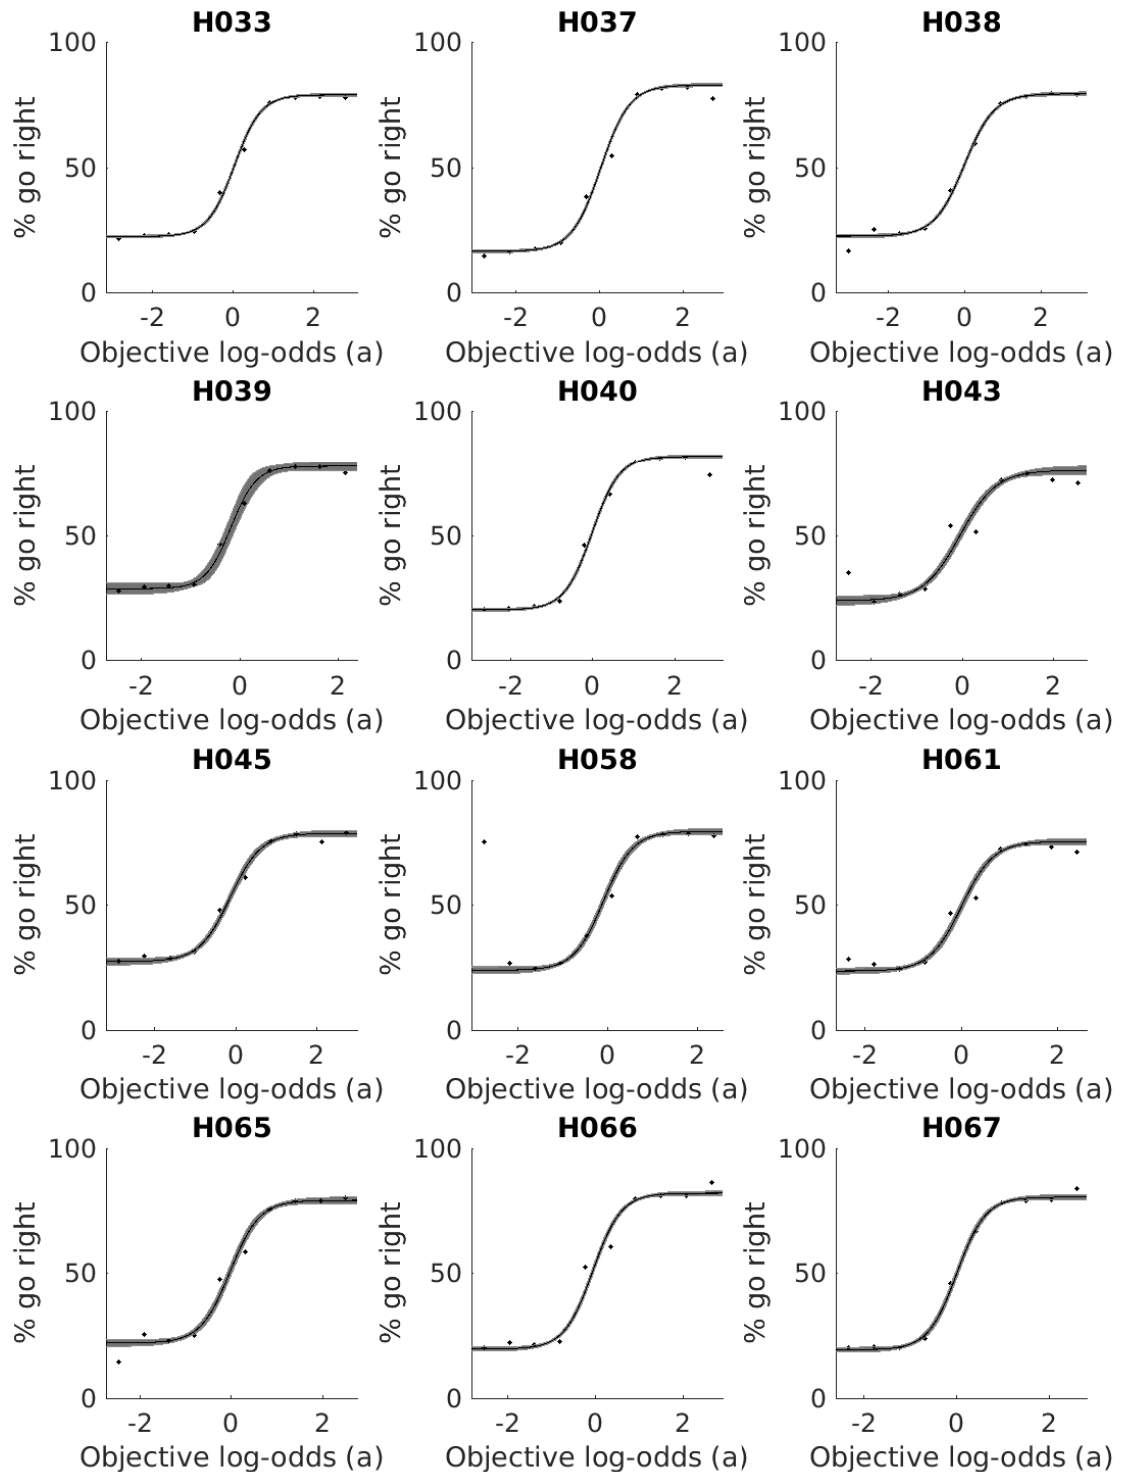

Figure 9: **Psychometric graph for all rats against ideal observer** Each trial performed by the rat was binned by the accumulation value (log-odds) of the ideal observer (ie, no sensory noise). The rat's average accuracy in each bin is shown (dots). A four parameter logistic function is fit to the data with 95% confidence intervals (line).

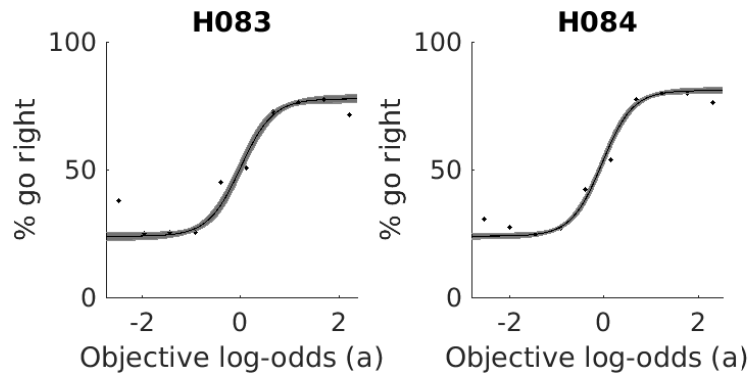

Figure 10: **Psychometric graph for all rats against ideal observer** Each trial performed by the rat was binned by the accumulation value (log-odds) of the ideal observer (ie, no sensory noise). The rat's average accuracy in each bin is shown (dots). A four parameter logistic function is fit to the data with 95% confidence intervals (line).

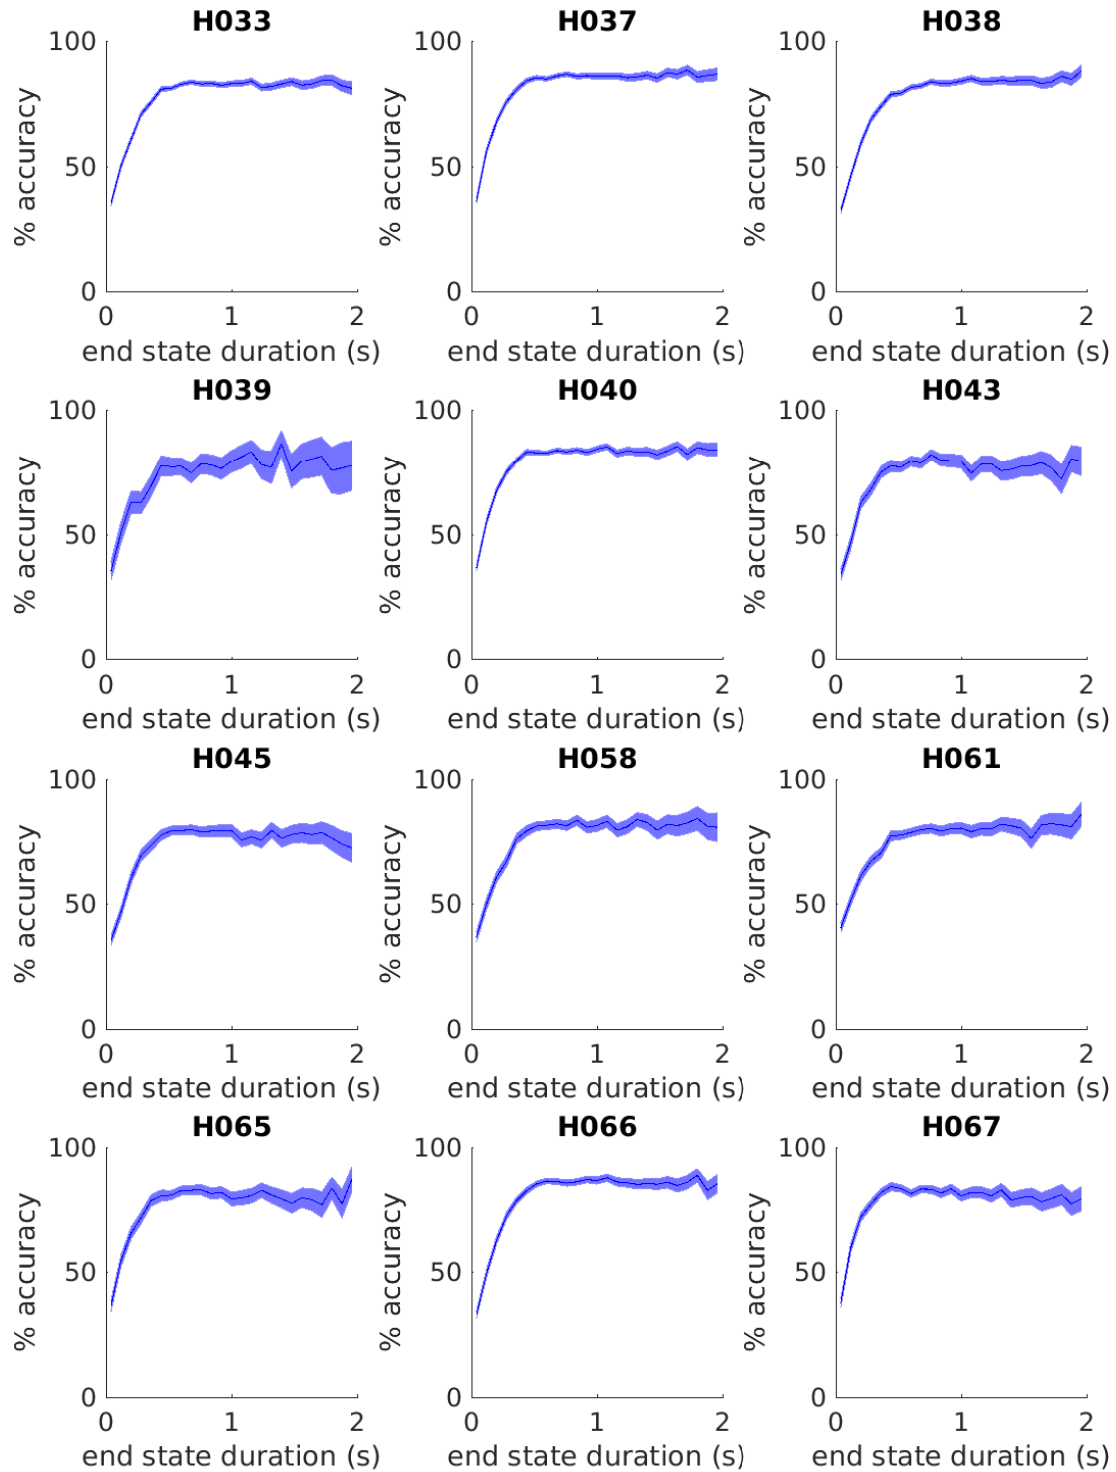

Figure 11: **Chronometric graph for all rats** Each trial was binned by the amount of time since the last change in the hidden environmental state. The average accuracy of each bin is shown.

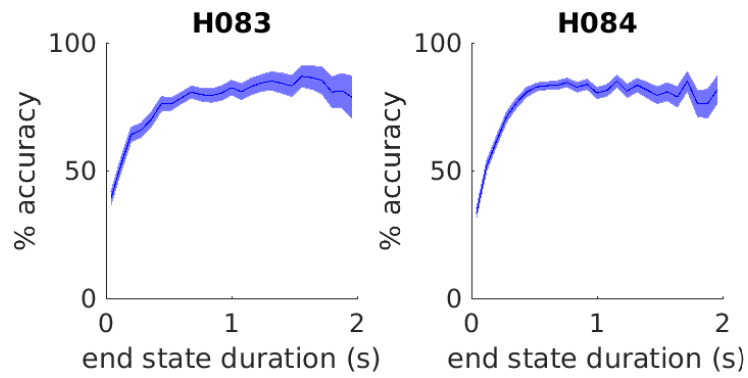

Figure 12: **Chronometric graph for all rats** Each trial was binned by the amount of time since the last change in the hidden environmental state. The average accuracy of each bin is shown.

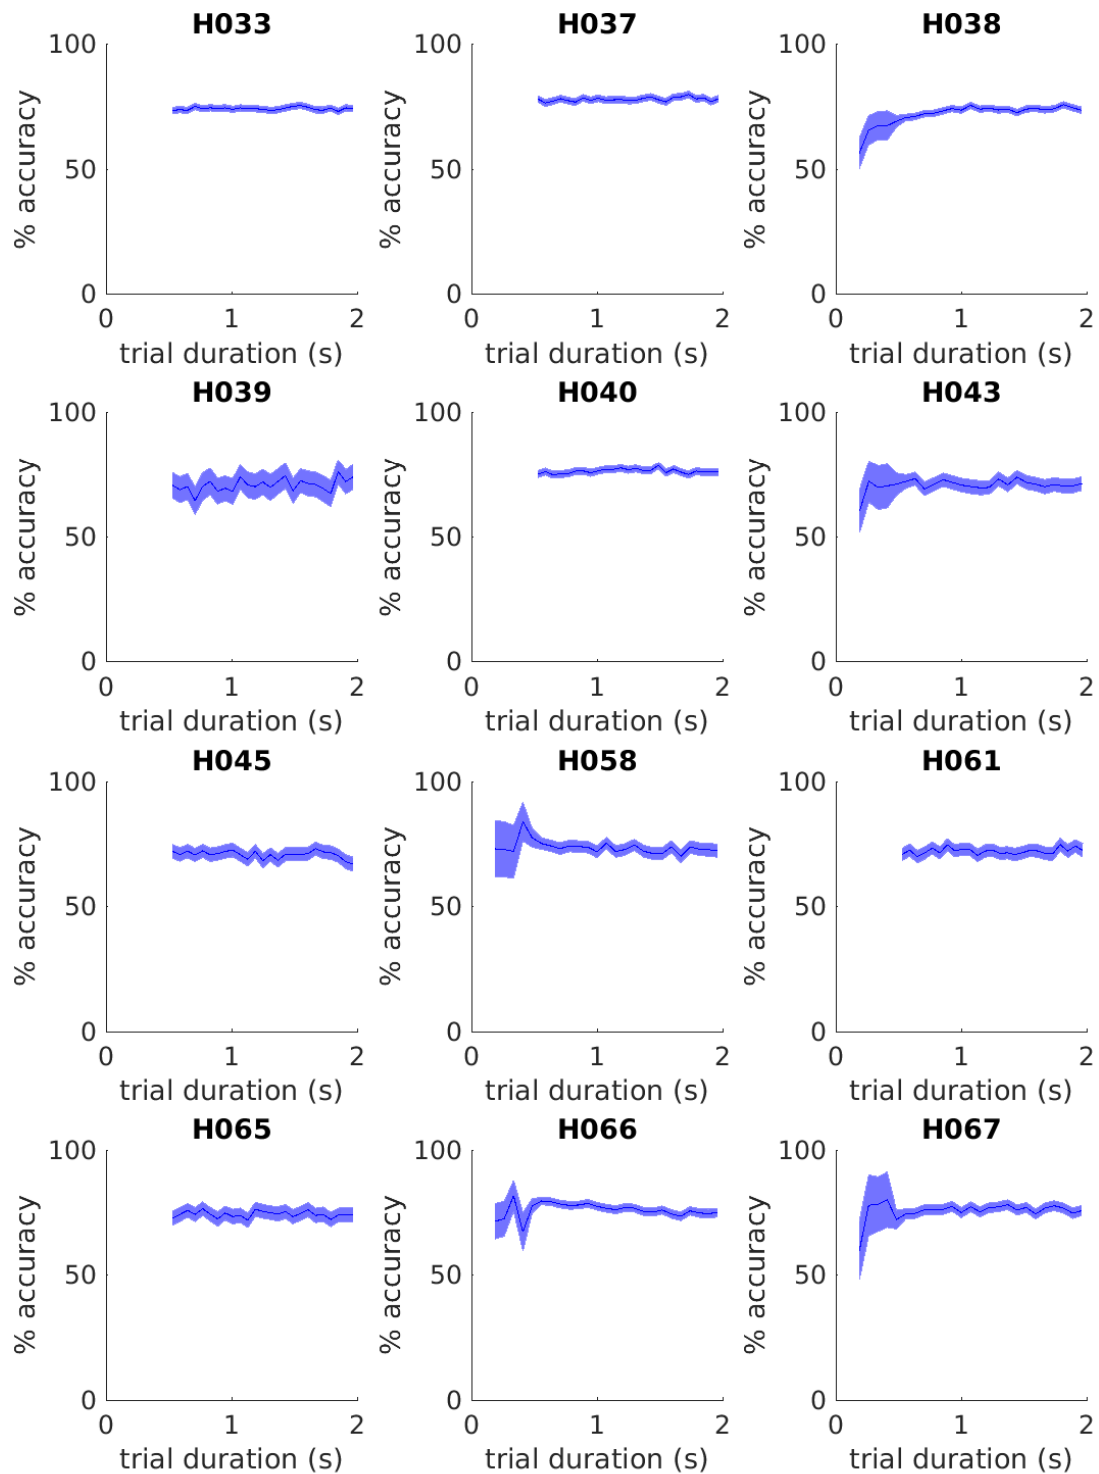



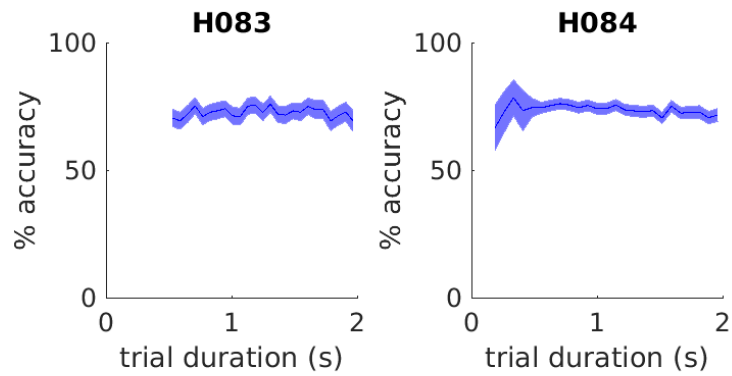

Figure 14: **Chronometric graph for all rats** Each trial was binned by the total trial duration. The average accuracy of each bin is shown. Most trials were drawn from the range (0.5 - 2) seconds; however, some rats experience a small number of shorter trials, leading to greater uncertainty for those durations.

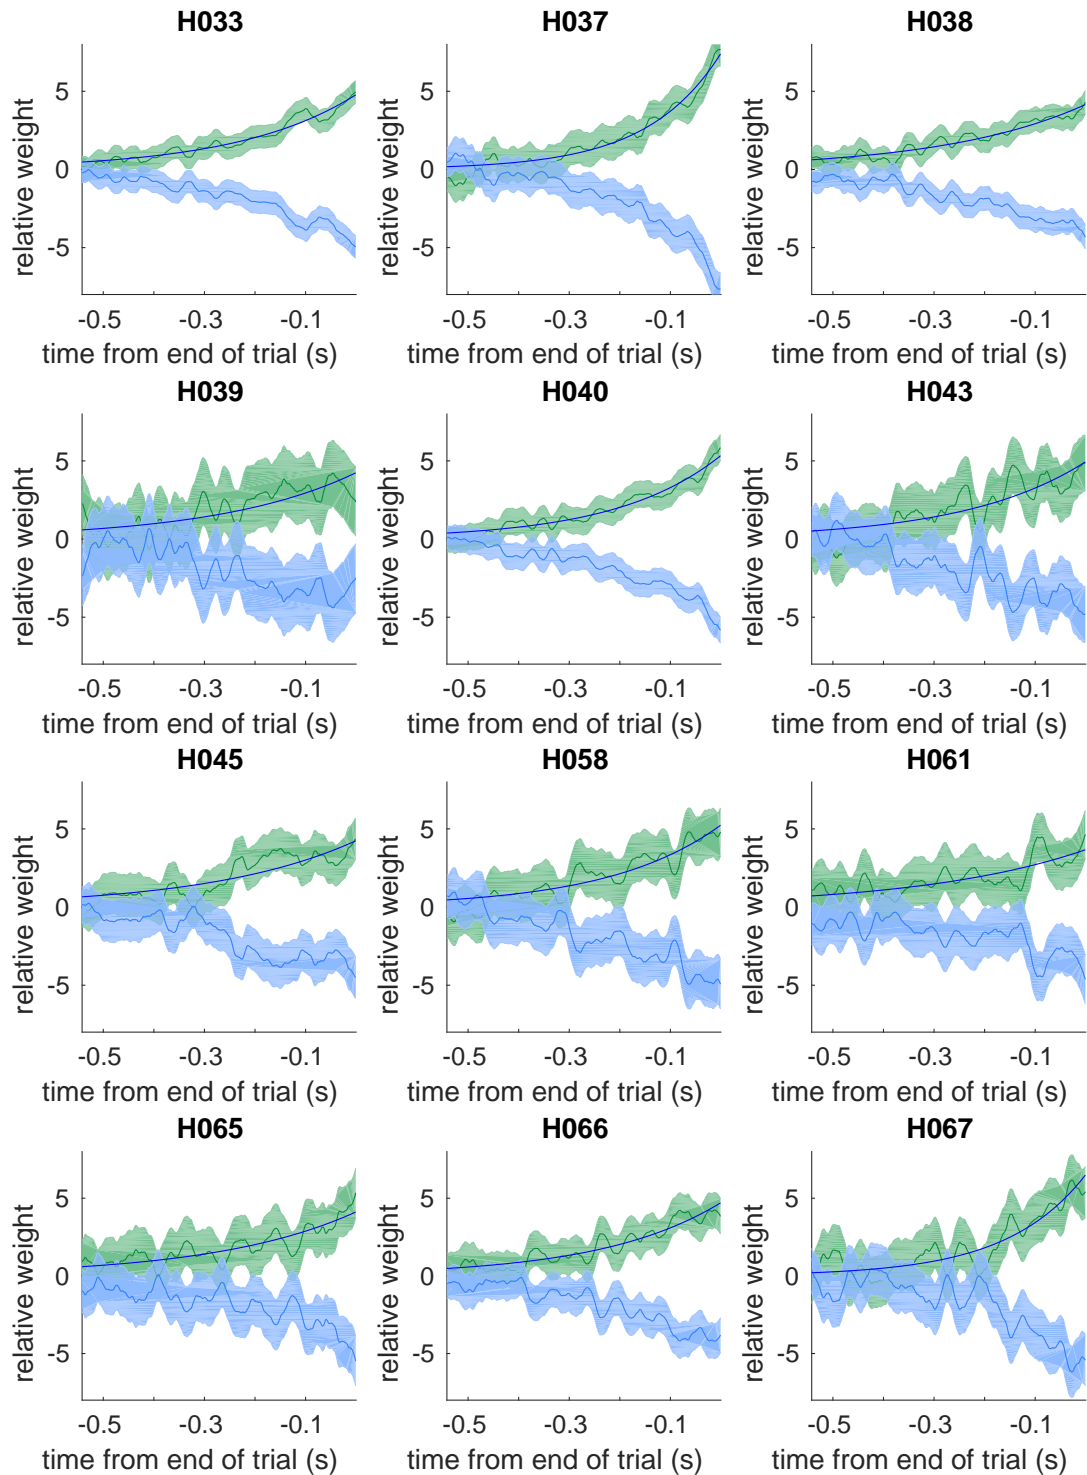

Figure 15: **Reverse Correlation for all rats** Reverse Correlation curves for each rat (black), as well as the best fit exponential discounting function (blue).

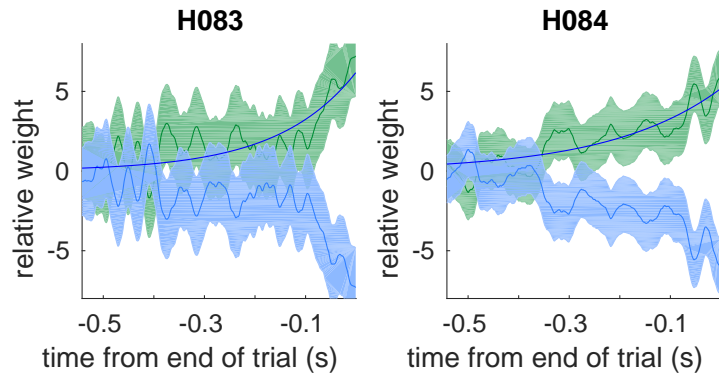

Figure 16: **Reverse Correlation for all rats** Reverse Correlation curves for each rat (black), as well as the best fit exponential discounting function (blue).

## 556 Optimal inference details

### 557 Derivation of optimal inference

558 Here we provide more detail on the derivation from equation (2) to equation (3). This derivation was  
 559 developed by Veliz-Cuba et al. 2016, see equations 3.2 and 3.3. However, we do not approximate the  
 560 evidence term into its first two moments, instead evaluating the evidence term. For this reason we  
 561 report the same derivation but halting at the intermediate step not shown in Veliz-Cuba et al. 2016.

562

Beginning with the evidence ratio, equation (2) in the present study, and equation 3.2 in Veliz-Cuba et al. 2016.

$$R_t = \frac{P(S^1|\epsilon_{1..t})}{P(S^2|\epsilon_{1..t})} = \frac{P(\epsilon_t|S^1)}{P(\epsilon_t|S^2)} \left( \frac{(1-h\Delta t)R_{t-1} + h\Delta t}{(h\Delta t)R_{t-1} + 1 - h\Delta t} \right). \quad (27)$$

Dividing each side by  $R_{t-1}$

$$\frac{R_t}{R_{t-1}} = \frac{P(\epsilon_t|S^1)}{P(\epsilon_t|S^2)} \left( \frac{(1-h\Delta t)R_{t-1} + h\Delta t}{(h\Delta t)R_{t-1} + 1 - h\Delta t} \right) \frac{1}{R_{t-1}}. \quad (28)$$

Now, define  $\hat{a}_t = \log(R_t)$ , and take the logarithm of both sides:

$$\hat{a}_t - \hat{a}_{t-1} = \log \left( \frac{P(\epsilon_t|S^1)}{P(\epsilon_t|S^2)} \right) + \log \left( \frac{(1-h\Delta t) + h\Delta t e^{-\hat{a}_{t-1}}}{(h\Delta t) e^{\hat{a}_{t-1}} + 1 - h\Delta t} \right), \quad (29)$$

$$\Delta \hat{a}_t = \log \left( \frac{P(\epsilon_t|S^1)}{P(\epsilon_t|S^2)} \right) + \log \left( \frac{(1-h\Delta t) + h\Delta t e^{-\hat{a}_{t-1}}}{(1-h\Delta t) + h\Delta t e^{\hat{a}_{t-1}}} \right), \quad (30)$$

$$\Delta \hat{a}_t = \log \left( \frac{P(\epsilon_t|S^1)}{P(\epsilon_t|S^2)} \right) + \log \left( 1 + h\Delta t \left( t e^{-\hat{a}_{t-1}} - 1 \right) \right) - \log \left( 1 + h\Delta t \left( e^{\hat{a}_{t-1}} - 1 \right) \right) \quad (31)$$

Using the approximation  $\log(1+a) \approx a$ , which is valid when  $|a| \ll 1$ . Here,  $h\Delta t \ll 1$ .

$$\Delta \hat{a}_t = \log \left( \frac{P(\epsilon_t|S^1)}{P(\epsilon_t|S^2)} \right) + h\Delta t \left( e^{-\hat{a}_{t-1}} - 1 \right) - h\Delta t \left( e^{\hat{a}_{t-1}} - 1 \right), \quad (32)$$

$$\Delta \hat{a}_t = \log \left( \frac{P(\epsilon_t|S^1)}{P(\epsilon_t|S^2)} \right) + h\Delta t \left( e^{-\hat{a}_{t-1}} - e^{\hat{a}_{t-1}} \right). \quad (33)$$

Using  $\sinh(x) = \frac{1}{2}(e^x - e^{-x})$ :

$$\Delta \hat{a}_t = \log \left( \frac{P(\epsilon_t|S^1)}{P(\epsilon_t|S^2)} \right) - 2h\Delta t \sinh(\hat{a}_{t-1}). \quad (34)$$

Here, we again use  $\Delta t \ll 1$  to justify replacing  $\hat{a}_{t-1}$  with  $\hat{a}_t$  on the right hand side. Evaluating the evidence term as derived in the main text, and rescaling  $\kappa$ :

$$\Delta a_t = \delta_{t,R} - \delta_{t,L} - \frac{2h}{\kappa} \Delta t \sinh(\kappa a_t). \quad (35)$$

Taking the limit of  $\Delta t \rightarrow 0$ :

$$da_t = \delta_{t,R} - \delta_{t,L} - \frac{2h}{\kappa} \sinh(\kappa a_t) dt. \quad (36)$$

563 Here we are making the assumption that the action of the auditory clicks happen instantaneously with  
564 respect to the accumulation equation.

565

### 566 **Decreasing click reliability lengthens integration timescales**

567 We found that plotting the evidence discounting term with less reliable clicks (smaller  $\kappa$ ) resulted in a  
568 flatter curve, which corresponds to a longer integration timescale. To see this relationship more clearly  
569 we can expand the discounting function in a Taylor series around the origin:

$$f(x) \approx f(a) + \frac{f'(a)}{1!} (x-a) + \frac{f''(a)}{2!} (x-a)^2 + \frac{f'''(a)}{3!} (x-a)^3 + \dots \quad (37)$$

$$\frac{2h}{\kappa} \sinh(\kappa x) \approx \frac{2h}{\kappa} \sinh(0) + \frac{2h}{\kappa} \frac{\kappa}{1!} \cosh(\kappa \cdot 0) (x-0) + \frac{2h}{\kappa} \frac{\kappa^2}{2!} \sinh(\kappa \cdot 0) (x-0)^2 \quad (38)$$

570 The even terms drop out, and we collect the odd terms:

$$\frac{2h}{\kappa} \sinh(\kappa x) \approx 2hx + \frac{2h\kappa^2}{3!} x^3 + \frac{2h\kappa^4}{5!} x^5 + \dots \quad (39)$$

571 We find that  $\kappa$  only appears with even power exponents in odd powers of  $x$ . Increasing  $\kappa$  will increase  
572 the strength of the discounting function. Increasing the strength of the discounting function leads to  
573 shorter integration timescales. In short, increasing  $\kappa$  shortens the integration timescale. Decreasing  $\kappa$   
574 lengthens the integration timescale.

## 575 Sensory noise parameterization details

576 The main analysis in the text derives optimal inference given sensory noise that is discrete, clicks are  
 577 either localized on one side or the other. It is easy to imagine many other forms of sensory noise,  
 578 including Gaussian fluctuations in the click amplitude, or simply missing clicks. Here we demonstrate  
 579 by evaluating the log-evidence term that decreases in click reliability are primarily driven by click  
 580 mislocalization, not fluctuations in the perceived amplitude of the clicks, or missed clicks. Finally, we  
 581 provide a general argument for why only click mislocalization matters

### 583 Click reliability with Gaussian sensory noise

584 Consider Gaussian noise where the clicks played from the right/left are perceived with amplitude given  
 585 by  $\mathcal{N}(\pm\mu, \sigma^2)$ . Here we interpret clicks with positive amplitude as right clicks, and negative amplitude  
 586 as left clicks. Note that if  $\sigma^2$  is sufficiently large, clicks will be mislocalized.

587 To compute the reliability of an individual click with a specific amplitude fluctuation ( $a$ ), we need  
 588 to compute the probability of a click generated on the right being observed with amplitude  $a$ :  $P_r(a)$ , as  
 589 well as the probability of a click generated on the left being observed with amplitude  $a$ :  $P_l(a)$ . Formally  
 590 we need to integrate the Gaussian probability density function over a small window centered at  $a$ .

$$P_r(a) = \int_{a-\epsilon}^{a+\epsilon} \frac{1}{\sqrt{2\pi\sigma^2}} e^{-\frac{(\mu-s)^2}{2\sigma^2}} ds \quad (40)$$

$$P_l(a) = \int_{a-\epsilon}^{a+\epsilon} \frac{1}{\sqrt{2\pi\sigma^2}} e^{-\frac{(-\mu-s)^2}{2\sigma^2}} ds \quad (41)$$

$$\kappa(r_1, r_2, P_r, P_l) = \log \frac{(r_1\Delta t)P_r(1-r_2\Delta t) + (1-r_1\Delta t)(r_2\Delta t)P_l}{(r_2\Delta t)P_r(1-r_1\Delta t) + (1-r_2\Delta t)(r_1\Delta t)P_l}. \quad (42)$$

This expression for  $\kappa$  seems hard to interpret, but notice what happens if  $P_l = 0$ .

$$\kappa(r_1, r_2, P_r, 0) = \log \frac{(r_1\Delta t)(1-r_2\Delta t)}{(r_2\Delta t)(1-r_1\Delta t)} = \kappa(r_1, r_2). \quad (43)$$

591 In this case,  $P_r$  drops out entirely, and we get the same value of  $\kappa$  as the no-noise case. This demonstrates  
 592 that click mislocalization is necessary for a decrease in click reliability.

593 Next, we will compare how the Gaussian click reliability scales with the rate of mislocalization. We  
 594 generated a dataset of trials where each click had an amplitude drawn from a Gaussian distribution. We  
 595 asked what was the accuracy of the nonlinear inference using the Gaussian click reliability derived above,  
 596 and what is the discounting rate of the best linear discounting agent? We refer to this as “quenched

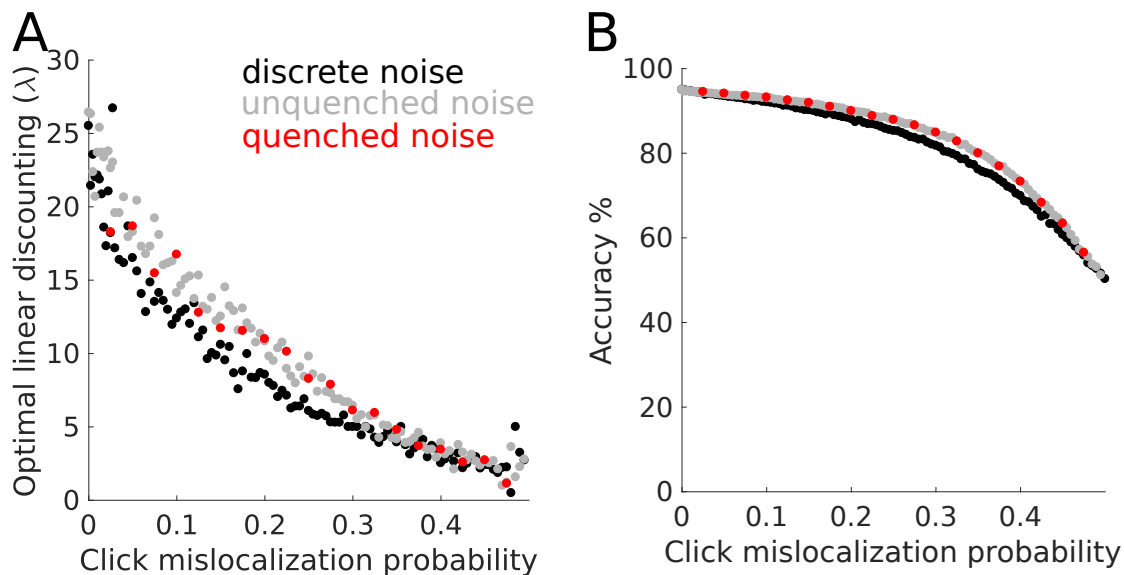

Figure 17: **Three Interpretations of Gaussian noise** Numerically optimized discounting rates for different noise amplitudes. (Black dots) Discrete noise, same points as Figure 2. (Grey dots) unquenched Gaussian noise of the form in equation (45). The unquenched fluctuations favor a larger discounting rate.

597 Gaussian noise,” the meaning of quenched is explained below. We then considered a second dataset  
 598 where the Gaussian amplitudes were thresholded to either be  $\pm 1$  reflecting whether the amplitude was  
 599 above or below 0. We refer to this as “discrete noise.” We compute the click mislocalization probability  
 600 for corresponding to each Gaussian variance  $\sigma^2$  by:

$$\langle n(\mu, \sigma^2) \rangle = \frac{1}{2} \left( \mu + \operatorname{erf} \left( \frac{1}{\sqrt{2\sigma_s^2}} \right) \right) \quad (44)$$

601 Figure 17 shows the results of the comparison. The discrete noise has a slight decrease in accuracy,  
 602 and a slightly smaller discounting rate. The difference is due to clicks that weakly change sign. The  
 603 discrete noise doesn’t distinguish between small and large amplitude clicks, where the quenched Gaus-  
 604 sian noise does. Importantly, in the noise regime we expect the rats, there is no difference between  
 605 these interpretations of sensory noise.

606

### 607 Unquenched Gaussian noise in the quantitative model

608 Gaussian noise subjects the clicks to large amplitude fluctuations in how they are perceived. Our  
 609 quantitative model handles these fluctuations slightly differently from the normative theory outlined  
 610 in the section above. First, observe that in the optimal inference theory, the evidence reliability term  
 611 quenches large amplitude fluctuations. Following the derivation in the section above,  $\kappa(r_1, r_2, P_r, P_l)$   
 612 is bounded between  $\pm \kappa(r_1, r_2)$ , so the evidence added to the accumulation variable after each click is  
 613 bounded (“quenched”) and not subjected to large amplitude fluctuations.

614 Second, we asked whether the presence of large amplitude fluctuations of click amplitudes if they are  
615 not quenched, would cause a linear approximation to favor a stronger evidence discounting in order to  
616 dampen the fluctuations. Specifically, we asked whether an evidence discounting agent with unquenched  
617 Gaussian noise:

$$da = (\delta_{R,t} - \delta_{L,t}) \mathcal{N}(1, \sigma^2) - \lambda dt, \quad (45)$$

618 would maximize accuracy with a larger  $\lambda$  than the same click mislocalization strength implemented as  
619 quenched noise in the normative theory. Quenched noise as properly implemented in the normative  
620 theory would look like:

$$da = (\delta_{R,t} - \delta_{L,t}) \kappa(r_1, r_2, \mathcal{N}(1, \sigma^2)) - \lambda dt. \quad (46)$$

621 Figure 17 shows a comparison between quenched and unquenched Gaussian noise. We find no differ-  
622 ence between these interpretations. In panel B, the accuracy of the unquenched Gaussian noise is from  
623 the best linear discounting agent, because we do not have a normative theory for unquenched noise  
624 (precisely what the simulation was asking to compare).

625

### 626 **Click reliability with missed clicks**

627 An alternative form of sensory noise might parameterize the probability that a subject just fails to  
628 hear a click at all. Using this framework, we show that missed clicks doesn't change the click reliability  
629 function. Assume a click that is generated is not detected at all with probability  $m$ . Then, the click  
630 reliability of a click on the right can be computed as:

$$\kappa(r_1, r_2, m) = \log \left( \frac{r_1(1-m)r_2m + r_1(1-m)(1-r_2)}{r_2(1-m)r_1m + r_2(1-m)(1-r_1)} \right) \quad (47)$$

631 We can interpret this expression as the probability of having a click be generated on one side and not  
632 missed and a click generated on the other side and missed, or the probability of a click being generated  
633 on one side and not being missed and no click is generated on the other side. Given that  $\Delta t \ll 1$ , we  
634 can remove second order terms in  $\Delta t$ :

$$\kappa(r_1, r_2, m) = \log \left( \frac{r_1(1-m)}{r_2(1-m)} \right) = \log \left( \frac{r_1}{r_2} \right) \quad (48)$$

635 We find the click reliability is independent of the probability of missing a click,  $m$ .



## 636 **A general argument for click mislocalization**

637 In the previous sections we demonstrated that in the case of missed clicks, or gaussian clicks, mislocal-  
638 ization is necessary for decreasing click reliability. Here we provide a general argument for why that is  
639 true under any form of sensory noise. The auditory evidence takes on two possible values  $S = \{+1, -1\}$ .  
640 Let  $y$  be the value of each auditory stimuli after being noisily encoded by the sensory transduction pro-  
641 cess ( $y = f(S)$ ). If  $f()$  maps left and right clicks separately into non-overlapping distributions of click  
642 amplitudes, then an ideal observer can bin  $y$  into groups  $y < 0$  and  $y > 0$ , and perfectly recover the  
643 original signal  $S$ . If  $f()$  maps left and right clicks into overlapping distributions, then an observer can-  
644 not bin  $y$  to perfectly recover the original signal. If the observer uses the same binary binning scheme  
645 as before, then the error rate in the recovered signal will be equal to the mislocalization rate. Notice  
646 that an observer with perfect knowledge of the distribution of  $f()$  can do slightly better by using a  
647 different binning scheme. If the observer recognizes that clicks in the domain where the left and right  
648 distributions overlap are less trustworthy, then the observer can use multiple bins to discount specifi-  
649 cally those clicks near 0. The Gaussian reliability function above  $\kappa(r_1, r_2, P_r, P_l)$  can be considered an  
650 observer with an infinite number of bins. As seen in figure 17, this strategy slightly improves accuracy  
651 above the two-binning strategy. We thus conclude that click mislocalization is the source of decreasing  
652 click reliability from sensory noise.

653

## 654 Psychophysical Reverse Correlation details

655 Here we present two control analyses on our reverse correlation method. First, we show that our method  
656 is not biased by the presence of a lapse rate, unlike logistic regression. Second, we rule out degenerate  
657 strategies like deciding based on only the last click.

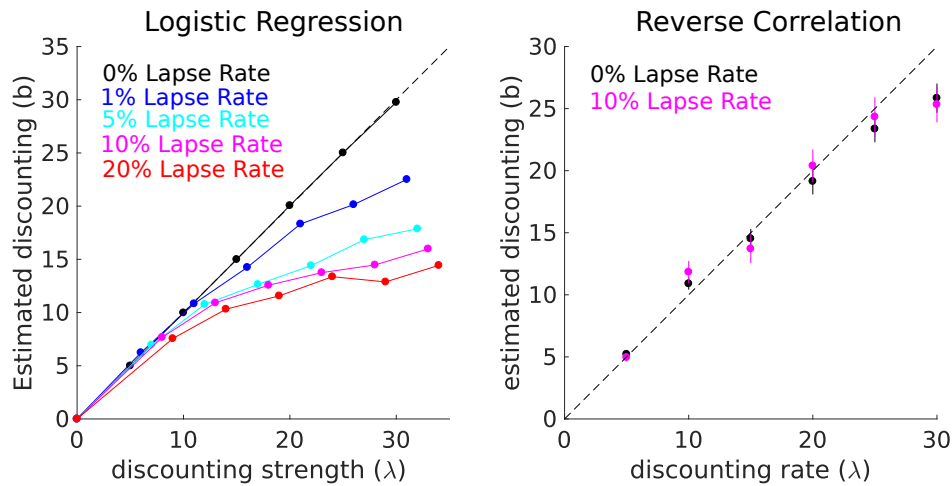

Figure 18: **Reverse Correlation timescales are unaffected by lapse rates.** Lapse rates are defined as the percentage of trials where the subject makes a random response. (A) Logistic regression is strongly biased by the presence of a lapse rate. (B) Psychophysical reverse correlation methods used in this study are not biased.

## 658 **Are the rats really integrating? Ruling out last click strategies**

659 One possible concern is that the rats might be relying on degenerate strategies like choosing based  
660 on the last click they heard. Or that the rat's integration timescale is so short, that their behavior  
661 shouldn't really be considering integration. Figure 19A shows a quasi-fixed point analysis of the optimal  
662 accumulation equation given a noise level. Assuming the environment stays in one state for a long  
663 time, we then replace the evidence term with the expected rate of clicks, and solve for the steady state  
664 accumulation value. We can see that for all noise levels, the fixed point lies above 1 click, so the optimal  
665 behavior necessarily involves integrating clicks. For the average rat noise level, we see integration of  
666 about 5 clicks.

667 Figure 19B shows the recovered discounting rate from the reverse correlation method against a  
668 simulated discounting agents, similar to Figure 3. Here, we include much stronger discounting agents,  
669 and find the recovered discounting rate asymptotes at just under 36 Hz, which is the expected total  
670 click rate ( $r_1 - r_2 \approx 36$ ). The last click strategy could be considered a discounting agent with an infinite  
671 discounting rate, and would be recovered in our analysis as a discounting rate of about 36. We find our  
672 rats are well away from this limit. Thus we confidently rule out a last click strategy.

673

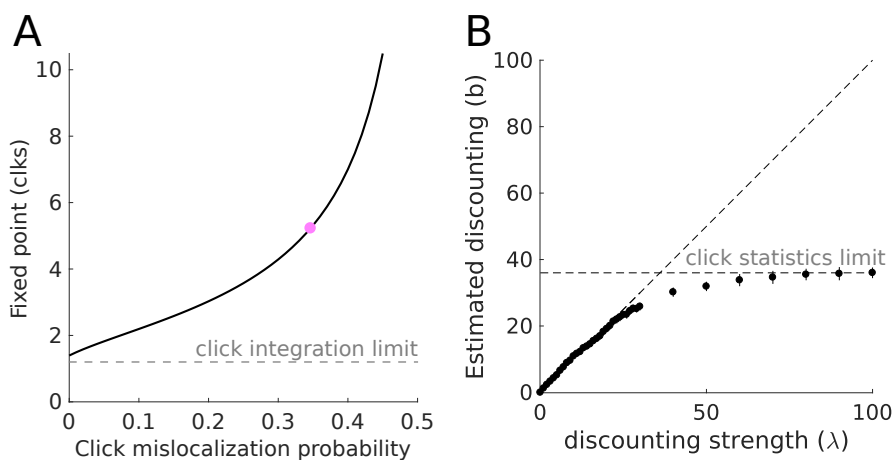

Figure 19: **Ruling out last click strategies.** (A) Quasi fixed points derived from the expected click rate and evidence discounting functions, assuming a fixed environmental state. For all noise levels, the fixed point is greater than 1 click. (B) Integration timescales measured from reverse correlation curves. At large discounting rates, the timescale saturates reflecting the timescale of click generation.

674 **Model details**

675

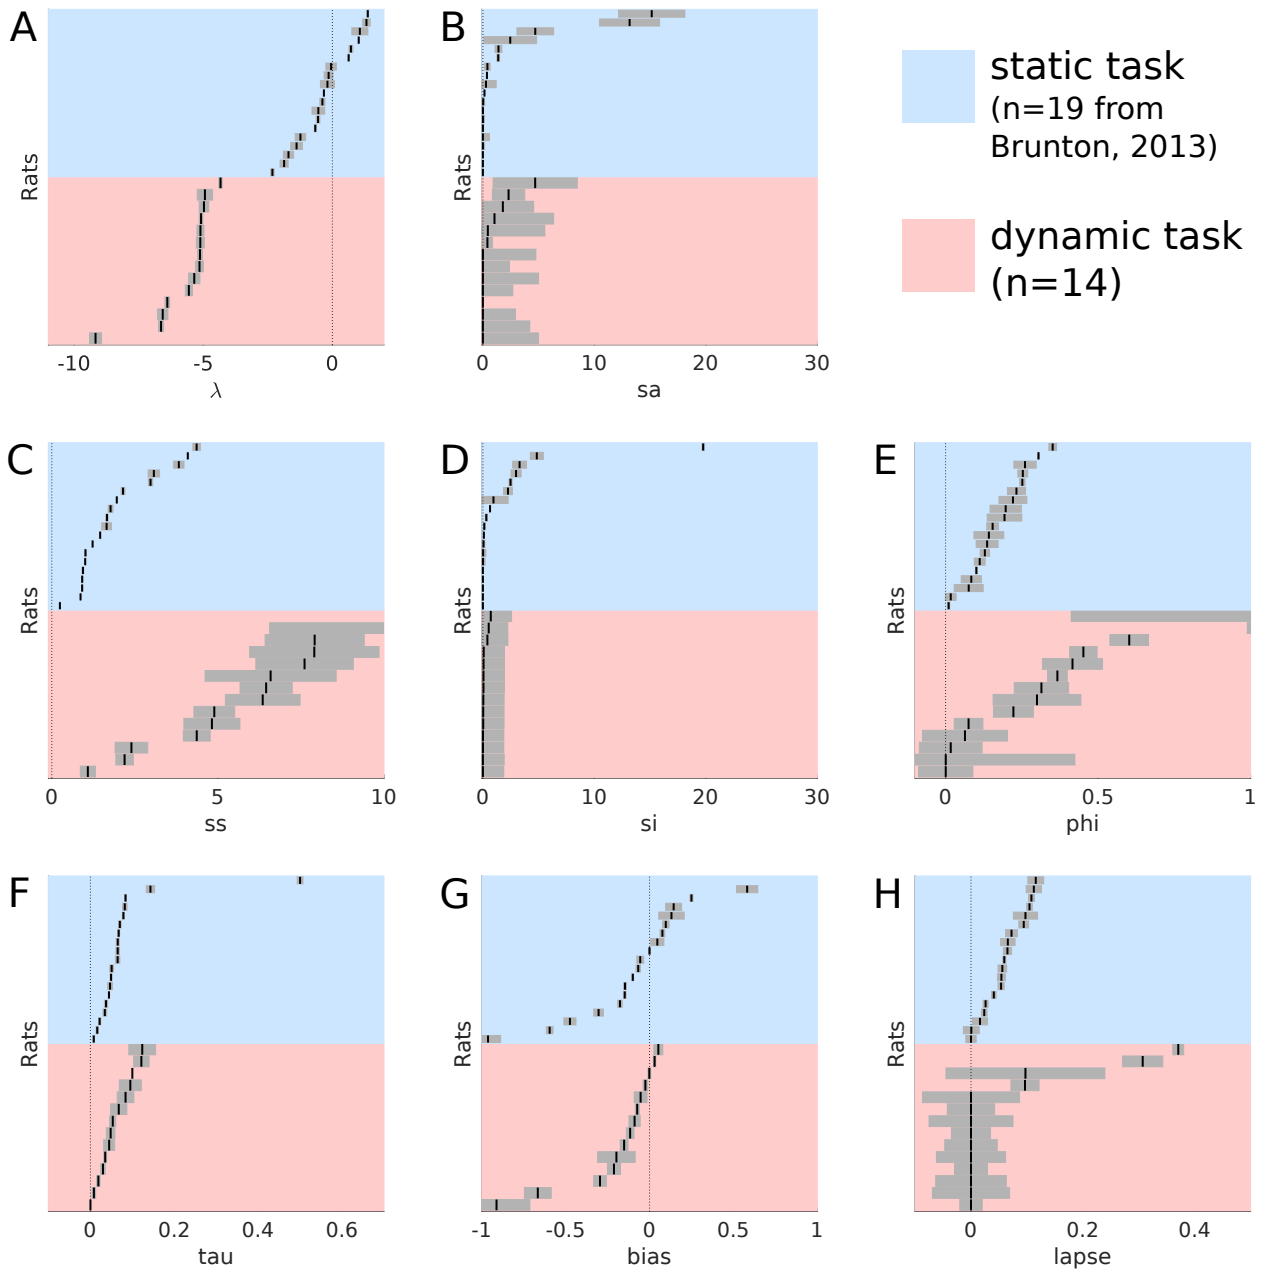

Figure 20: **Best fitting model parameters on static and dynamic tasks.** The best fitting parameters and their standard errors are shown for each rat in the current study, compared to each rat from Brunton et al. 2013. Each parameter plot has the rats sorted independently by parameter value, rows across panels do not indicate the same rat.

| rat  | $\lambda$         | $\sigma_s^2$         | $\sigma_a^2$     | $\sigma_i^2$         | $\phi$               | $\tau_\phi$             | Bias                | Lapse                 | $\lambda_{opt}$    |
|------|-------------------|----------------------|------------------|----------------------|----------------------|-------------------------|---------------------|-----------------------|--------------------|
| H033 | $-5.09 \pm 0.07$  | $1.79 \pm 2.76$      | $6.45 \pm 0.79$  | $0.060 \pm 1.87$     | $0.45 \pm 0.045$     | $0.053 \pm 0.0073$      | $-0.025 \pm 0.014$  | $1.1e - 6 \pm 0.042$  | $-5.03 \pm 0.014$  |
| H037 | $-6.39 \pm 0.092$ | $0.41 \pm 0.44$      | $2.19 \pm 0.26$  | $0.0076 \pm 1.87$    | $0.37 \pm 0.032$     | $0.12 \pm 0.018$        | $0.030 \pm 0.0072$  | $3.6e - 9 \pm 0.020$  | $-5.92 \pm 0.0079$ |
| H038 | $-4.33 \pm 0.063$ | $2e - 4 \pm 4.99$    | $11.6 \pm 0.99$  | $0.71 \pm 1.86$      | $1.20 \pm 0.79$      | $1.2e - 4 \pm 1.7e - 4$ | $-0.21 \pm 0.039$   | $0.097 \pm 0.025$     | $-5.13 \pm 0.091$  |
| H039 | $-4.94 \pm 0.30$  | $0.44 \pm 5.11$      | $11.52 \pm 4.96$ | $0.052 \pm 1.87$     | $5.3e - 4 \pm 0.42$  | $0.0083 \pm 0.0042$     | $-0.91 \pm 0.20$    | $0.097 \pm 0.14$      | $-4.56 \pm 0.13$   |
| H040 | $-6.64 \pm 0.099$ | $2.30 \pm 1.45$      | $4.36 \pm 0.40$  | $0.072 \pm 1.87$     | $0.075 \pm 0.047$    | $0.035 \pm 0.0034$      | $-0.073 \pm 0.012$  | $1.9e - 7 \pm 0.029$  | $-5.53 \pm 0.079$  |
| H043 | $-4.98 \pm 0.19$  | $1.04 \pm 5.3$       | $7.61 \pm 1.47$  | $0.052 \pm 1.87$     | $1.02 \pm 0.029$     | $0.12 \pm 0.032$        | $-0.20 \pm 0.11$    | $0.31 \pm 0.036$      | $-5.94 \pm 0.0022$ |
| H045 | $-5.11 \pm 0.13$  | $0.0029 \pm 2.37$    | $1.09 \pm 0.23$  | $0.028 \pm 1.87$     | $4.8e - 4 \pm 0.089$ | $0.048 \pm 0.010$       | $-0.67 \pm 0.079$   | $0.37 \pm 0.0098$     | $-5.27 \pm 0.18$   |
| H058 | $-5.15 \pm 0.15$  | $3.59e - 5 \pm 2.92$ | $4.82 \pm 0.84$  | $6.64e - 5 \pm 1.87$ | $0.42 \pm 0.098$     | $0.10 \pm 0$            | $-0.15 \pm 0.023$   | $1.64e - 7 \pm 0.063$ | $-4.87 \pm 0.42$   |
| H061 | $-5.12 \pm 0.15$  | $4.69 \pm 3.78$      | $6.59 \pm 1.97$  | $0.038 \pm 1.87$     | $0.31 \pm 0.089$     | $0.067 \pm 0.019$       | $0.053 \pm 0.026$   | $1e - 6 \pm 0.087$    | $-4.75 \pm 0.0026$ |
| H065 | $-6.57 \pm 0.20$  | $1.53e - 5 \pm 4.99$ | $7.91 \pm 1.49$  | $0.0065 \pm 1.87$    | $0.064 \pm 0.14$     | $0.019 \pm 0.0040$      | $-0.089 \pm 0.033$  | $4.09e - 8 \pm 0.069$ | $-5.37 \pm 0.0054$ |
| H066 | $-5.13 \pm 0.089$ | $5.9e - 5 \pm 2.68$  | $4.89 \pm 0.61$  | $0.52 \pm 1.71$      | $0.60 \pm 0.063$     | $0.084 \pm 0.019$       | $-0.12 \pm 0.022$   | $3.8e - 7 \pm 0.035$  | $-5.58 \pm 0.27$   |
| H067 | $-9.18 \pm 0.23$  | $3.9e - 5 \pm 0$     | $2.40 \pm 0.49$  | $0.40 \pm 1.84$      | $0.22 \pm 0.065$     | $0.095 \pm 0.026$       | $-0.0012 \pm 0.077$ | $3.3e - 7 \pm 0.047$  | $-6.05 \pm 0.081$  |
| H083 | $-5.35 \pm 0.22$  | $0.0034 \pm 4.75$    | $7.90 \pm 1.95$  | $0.028 \pm 1.87$     | $0.30 \pm 0.14$      | $0.045 \pm 0.013$       | $-0.053 \pm 0.038$  | $9.5e - 7 \pm 0.075$  | $-4.87 \pm 0.025$  |
| H084 | $-5.56 \pm 0.014$ | $3.5e - 5 \pm 4.21$  | $6.35 \pm 1.12$  | $1.02e - 4 \pm 1.91$ | $0.017 \pm 0.103$    | $0.029 \pm 0.0054$      | $-0.29 \pm 0.037$   | $2.3e - 7 \pm 0.062$  | $-5.17 \pm 0.12$   |

Table 1: Maximum likelihood parameters and the standard error for each parameter.

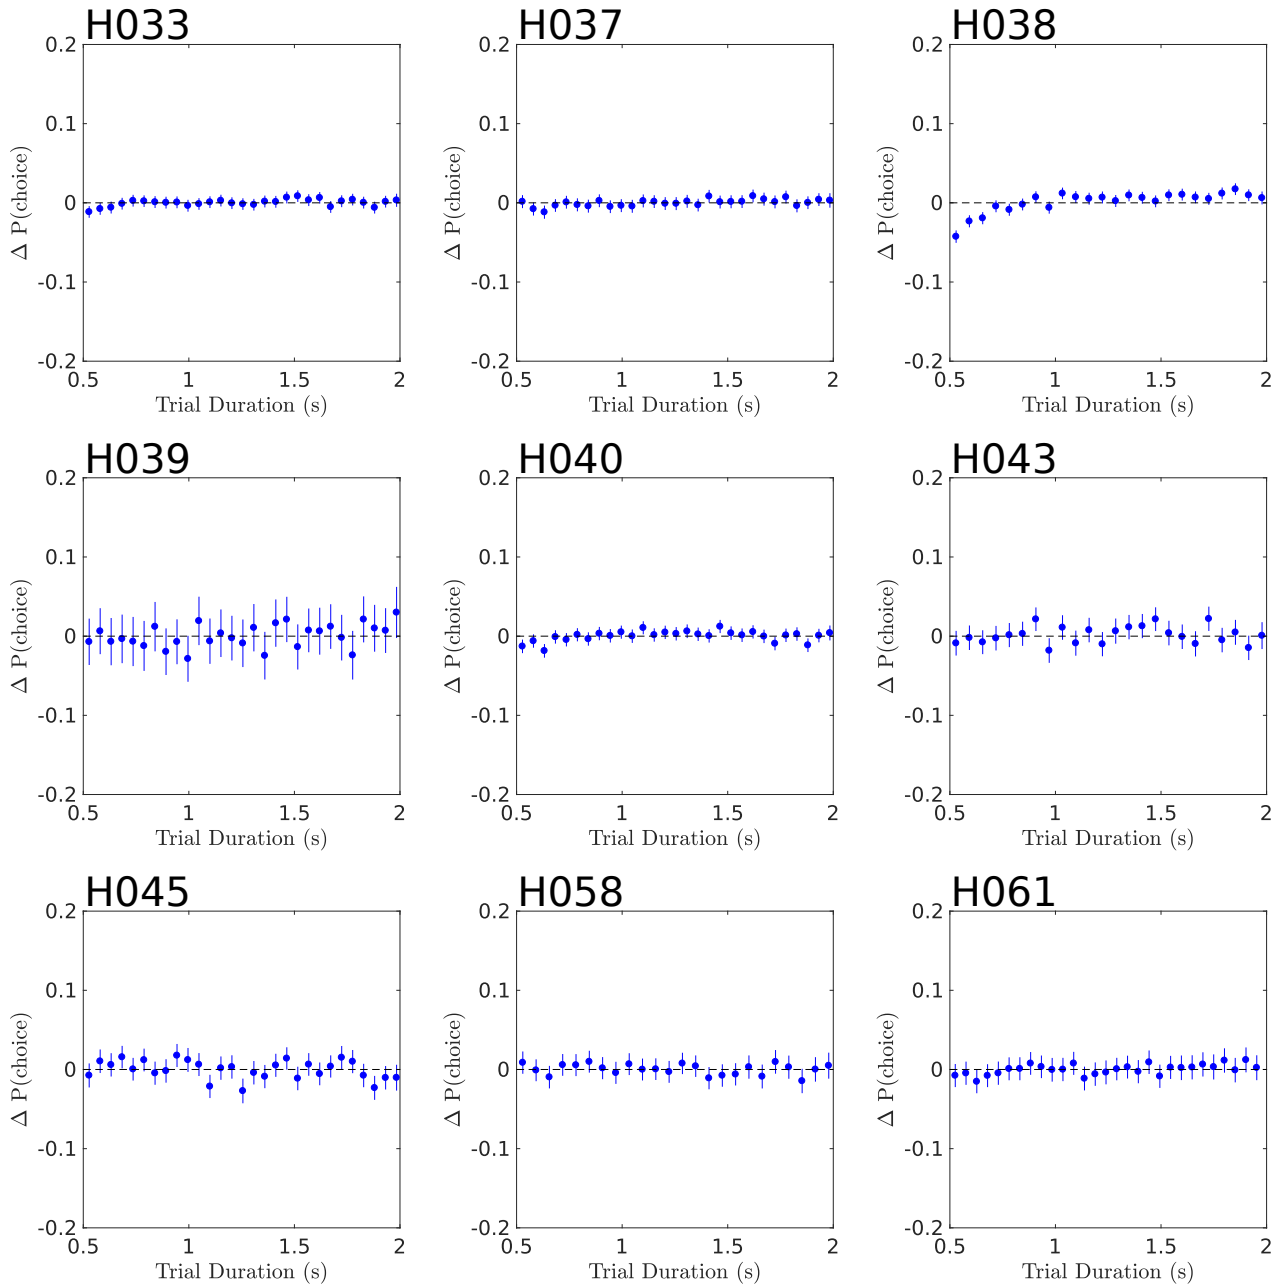

Figure 21: **Model Residual error against time** The model fits short and long trials equally well.

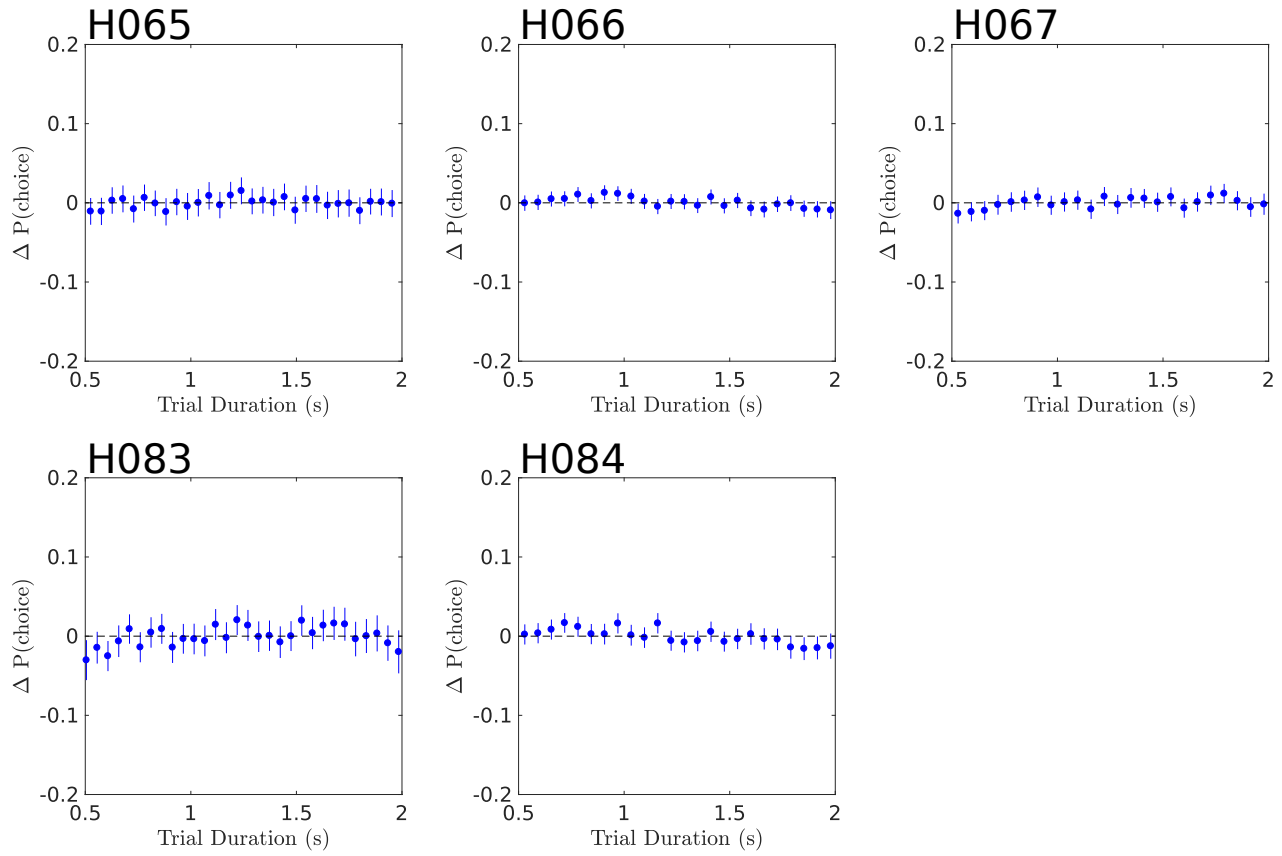

Figure 22: **Model Residual error against time** The model fits short and long trials equally well.

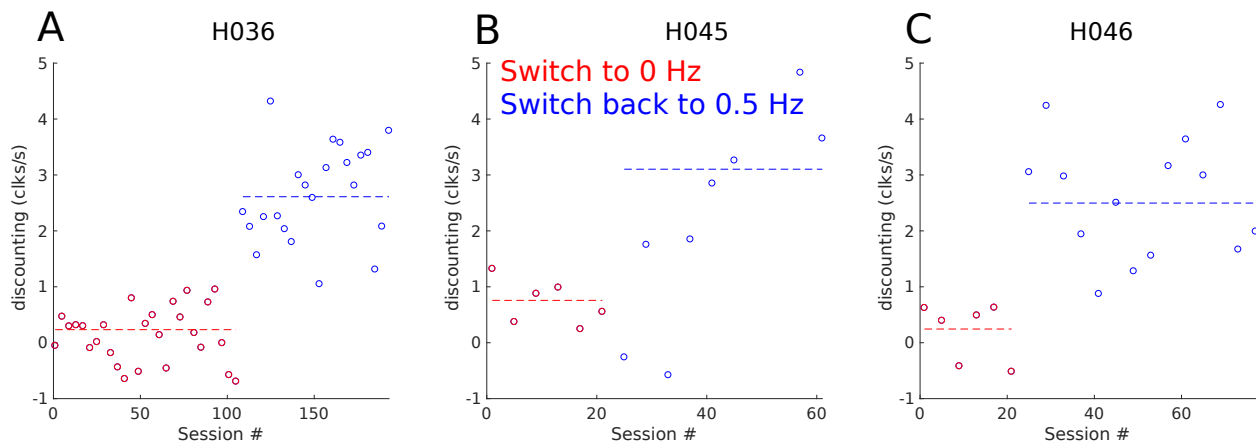

**Figure 23: Rats adjust their integration timescales quickly to new environments** Evidence discounting rates estimated in blocks of 4 sessions for each rat in figure 6D. Session 1 is the first session in the 0Hz environment. Each rat is then moved back to 0.5 Hz. Dashed lines show the evidence discounting rates estimated over all sessions of the same hazard rate. Variability across blocks of session is due to low trial count.



## 676 References

- 677 Aksay, E., Olasagasti, I., Mensh, B. D., Baker, R., Goldman, M. S., and Tank, D. W. (2007). Functional dissection of  
678 circuitry in a neural integrator. *Nat Neurosci*, 10(4):494–504. 17369822[pmid].
- 679 Barnard, G. A. (1946). Sequential tests in industrial statistics. *Supplement to the Journal of the Royal Statistical Society*,  
680 8(1):1–26.
- 681 Basten, U., Biele, G., Heekeren, H. R., and Fiebach, C. J. (2010). How the brain integrates costs and benefits during  
682 decision making. *Proceedings of the National Academy of Sciences*, 107(50):21767–21772.
- 683 Boerlin, M., Machens, C. K., and Denve, S. (2013). Predictive coding of dynamical variables in balanced spiking networks.  
684 *PLOS Computational Biology*, 9(11):1–16.
- 685 Bogacz, R., Brown, E., Moehlis, J., Holmes, P., and Cohen, J. D. (2006). The physics of optimal decision making: a  
686 formal analysis of models of performance in two-alternative forced-choice tasks. *Psychol Rev*, 113(4):700–765.
- 687 Brunton, B. W., Botvinick, M. M., and Brody, C. D. (2013). Rats and humans can optimally accumulate evidence for  
688 decision-making. *Science*, 340(6128):95–98.
- 689 Carandini, M. and Churchland, A. K. (2013). Probing perceptual decisions in rodents. *Nat Neurosci*, 16(7):824–831.  
690 Review.
- 691 Cisek, P., Puskas, G. A., and El-Murr, S. (2009). Decisions in changing conditions: The urgency-gating model. *Journal*  
692 *of Neuroscience*, 29(37):11560–11571.
- 693 Daw, N. (2011). *Trial-by-trial data analysis using computational models*. Oxford University Press.
- 694 Dayan, P. and Abbott, L. F. (2005). *Theoretical Neuroscience: Computational and Mathematical Modeling of Neural*  
695 *Systems*. The MIT Press.
- 696 Druckmann, S. and Chklovskii, D. (2012). Neuronal circuits underlying persistent representations despite time varying  
697 activity. *Current Biology*, 22(22):2095 – 2103.
- 698 Duan, C. A., Erlich, J. C., and Brody, C. D. (2015). Requirement of prefrontal and midbrain regions for rapid executive  
699 control of behavior in the rat. *Neuron*, 86(6):1491 – 1503.
- 700 Erlich, J. C., Bialek, M., and Brody, C. D. (2011). A cortical substrate for memory-guided orienting in the rat. *Neuron*,  
701 72(2):330–343.
- 702 Erlich, J. C., Brunton, B. W., Duan, C. A., Hanks, T. D., and Brody, C. D. (2015). Distinct effects of prefrontal and  
703 parietal cortex inactivations on an accumulation of evidence task in the rat. *eLife*, 4:e05457.
- 704 Feng, S., Holmes, P., Rorie, A., and Newsome, W. T. (2009). Can monkeys choose optimally when faced with noisy stimuli  
705 and unequal rewards? *PLOS Computational Biology*, 5(2):1–15.
- 706 Ganguli, S., Huh, D., and Sompolinsky, H. (2008). Memory traces in dynamical systems. *Proceedings of the National*  
707 *Academy of Sciences*, 105(48):18970–18975.
- 708 Glaze, C. M., Kable, J. W., and Gold, J. I. (2015). Normative evidence accumulation in unpredictable environments.  
709 *eLife*, 4:e08825.

- 710 Gold, J. I. and Shadlen, M. N. (2001). Neural computations that underlie decisions about sensory stimuli. *Trends in*  
711 *cognitive sciences*, 5(1):10–16.
- 712 Gold, J. I. and Shadlen, M. N. (2007). The neural basis of decision making. *Annual Review of Neuroscience*, 30(1):535–574.  
713 PMID: 17600525.
- 714 Gold, J. I. and Stocker, A. A. (2017). Visual decision-making in an uncertain and dynamic world. *Annual Review of*  
715 *Vision Science*, 3(1):null. PMID: 28715956.
- 716 Goldman, M. S. (2009). Memory without feedback in a neural network. *Neuron*, 61(4):621–634.
- 717 Gureckis, T. M. and Love, B. C. (2009). Learning in noise: Dynamic decision-making in a variable environment. *Journal*  
718 *of Mathematical Psychology*, 53(3):180 – 193. Special Issue: Dynamic Decision Making.
- 719 Hanks, T. D., Kopec, C. D., Brunton, B. W., Duan, C. A., Erlich, J. C., and Brody, C. D. (2015). Distinct relationships  
720 of parietal and prefrontal cortices to evidence accumulation. *Nature*, 520(7546):220–223. Letter.
- 721 Hanks, T. D. and Summerfield, C. (2017). Perceptual decision making in rodents, monkeys, and humans. *Neuron*,  
722 93(1):15–31.
- 723 Iigaya, K., Ahmadian, Y., Sugrue, L., Corrado, G., Loewenstein, Y., Newsome, W. T., and Fusi, S. (2017). Learning fast  
724 and slow: Deviations from the matching law can reflect an optimal strategy under uncertainty. *bioRxiv*.
- 725 Kelly, S. P. and O’Connell, R. G. (2013). Internal and external influences on the rate of sensory evidence accumulation in  
726 the human brain. *Journal of Neuroscience*, 33(50):19434–19441.
- 727 Kiani, R., Cueva, C., Reppas, J., and Newsome, W. (2014). Dynamics of neural population responses in prefrontal cortex  
728 indicate changes of mind on single trials. *Current Biology*, 24(13):1542 – 1547.
- 729 Kira, S., Yang, T., and Shadlen, M. (2015). A neural implementation of walds sequential probability ratio test. *Neuron*,  
730 85(4):861 – 873.
- 731 Kopec, C., Erlich, J., Brunton, B., Deisseroth, K., and Brody, C. (2015). Cortical and subcortical contributions to  
732 short-term memory for orienting movements. *Neuron*, 88(2):367 – 377.
- 733 Krajbich, I., Hare, T., Bartling, B., Morishima, Y., and Fehr, E. (2015). A common mechanism underlying food choice  
734 and social decisions. *PLOS Computational Biology*, 11(10):1–24.
- 735 Lee, M. D. and Cummins, T. D. (2004). Evidence accumulation in decision making: Unifying the take the best and the  
736 rational models. *Psychonomic Bulletin & Review*, 11(2):343–352.
- 737 Maass, W., Natschlger, T., and Markram, H. (2002). Real-time computing without stable states: A new framework for  
738 neural computation based on perturbations. *Neural Computation*, 14(11):2531–2560.
- 739 Miller, K. J., Botvinick, M. M., and Brody, C. D. (2017). Dorsal hippocampus contributes to model-based planning. *Nat*  
740 *Neurosci*, advance online publication. Article.
- 741 Ossmy, O., Moran, R., Pfeffer, T., Tsetsos, K., Usher, M., and Donner, T. (2013). The timescale of perceptual evidence  
742 integration can be adapted to the environment. *Current Biology*, 23(11):981 – 986.

- 743 Peixoto, D., Kiani, R., Nuyujukian, P., Chandrasekaran, C., Brown, R., Fong, S., Shenoy, K., and Newsome, W. (2016).  
744 Real-time decoding of a decision variable during a perceptual discrimination task. In *Proceedings of Society for Neuro-*  
745 *science Annual Conference 2016*.
- 746 Philiastides, M. G., Auztulewicz, R., Heekeren, H. R., and Blankenburg, F. (2011). Causal role of dorsolateral prefrontal  
747 cortex in human perceptual decision making. *Current biology*, 21(11):980–983.
- 748 Piet, A., Erlich, J., Kopec, C., and Brody, C. D. (2017). Rat prefrontal cortex inactivations are explained by bistable  
749 attractor dynamics. *Neural Computation*.
- 750 Purcell, B. A., Heitz, R. P., Cohen, J. Y., Schall, J. D., Logan, G. D., and Palmeri, T. J. (2010). Neurally constrained  
751 modeling of perceptual decision making. *Psychological review*, 117(4):1113.
- 752 Ratcliff, R. and McKoon, G. (2008). The diffusion decision model: Theory and data for two-choice decision tasks. *Neural*  
753 *Computation*, 20(4):873–922. PMID: 18085991.
- 754 Revels, J., Lubin, M., and Papamarkou, T. (2016). Forward-mode automatic differentiation in julia. *CoRR*,  
755 abs/1607.07892.
- 756 Scott, B. B., Constantinople, C. M., Akrami, A., Hanks, T. D., Brody, C. D., and Tank, D. W. (2017). Fronto-parietal  
757 cortical circuits encode accumulated evidence with a diversity of timescales. *Neuron*, 95(2):385–398.e5.
- 758 Scott, B. B., Constantinople, C. M., Erlich, J. C., Tank, D. W., and Brody, C. D. (2015). Sources of noise during  
759 accumulation of evidence in unrestrained and voluntarily head-restrained rats. *eLife*, 4:e11308.
- 760 Seung, H. (1996). How the brain keeps the eyes still. *Proceedings of the National Academy of Sciences*, 93(23):13339–13344.
- 761 Veliz-Cuba, A., Kilpatrick, Z. P., and Josic, K. (2016). Stochastic models of evidence accumulation in changing environ-  
762 ments. *SIAM Review*.
- 763 Wald, A. (1945). Sequential tests of statistical hypotheses. *Ann. Math. Statist.*, 16(2):117–186.
- 764 Zylberberg, A., Fetsch, C. R., and Shadlen, M. N. (2016). The influence of evidence volatility on choice, reaction time  
765 and confidence in a perceptual decision. *eLife*, 5:e17688.
